1           **Inference of bacterial small RNA regulatory networks and integration with**  
2                           **transcription factor driven regulatory networks**

3  
4   Mario L. Arrieta-Ortiz<sup>1,2</sup>, Christoph Hafemeister<sup>1</sup>, Bentley Shuster<sup>1</sup>, Nitin S. Baliga<sup>2</sup>, Richard  
5   Bonneau<sup>1,3,4,\*</sup> and Patrick Eichenberger<sup>1,\*</sup>

6  
7   <sup>1</sup>Center for Genomics and Systems Biology, Department of Biology, New York University, New  
8   York, NY, USA

9   <sup>2</sup>Institute for Systems Biology, Seattle, WA, USA

10   <sup>3</sup>Center for Computational Biology, Flatiron Institute, New York, NY, USA

11   <sup>4</sup>Center for Data Science, New York University, New York, NY, USA

12   \*Corresponding authors

13

14

15 **ABSTRACT**

16 Small non-coding RNAs (sRNAs) are key regulators of bacterial gene expression. Through  
17 complementary base pairing, sRNAs affect messenger RNA stability and translation efficiency.  
18 Here, we describe a network inference approach designed to identify sRNA-mediated regulation  
19 of transcript levels. We use existing transcriptional datasets and prior knowledge to infer sRNA  
20 regulons using our network inference tool, the *Inferelator*. This approach produces genome-wide  
21 gene regulatory networks that include contributions by both transcription factors and sRNAs. We  
22 show the benefits of estimating and incorporating sRNA activities into network inference  
23 pipelines. We comprehensively assess the accuracy of inferred sRNA regulons using available  
24 experimental data. We uncover 30 novel experimentally supported sRNA-mRNA interactions in  
25 *Escherichia coli*, outperforming previous network-based efforts. Our findings expand the role of  
26 sRNAs in the regulation of chemotaxis, oxidation-reduction processes, galactose intake, and  
27 generation of pyruvate. Additionally, our pipeline complements sequence-based sRNA-mRNA  
28 interaction prediction methods by adding a data-driven filtering step. Finally, we show the  
29 general applicability of our approach by identifying novel, experimentally supported, sRNA-  
30 mRNA interactions in *Pseudomonas aeruginosa* and *Bacillus subtilis*. Overall, our strategy  
31 generates novel insights into the functional implications of sRNA regulation in multiple bacterial  
32 species.

33

34 **IMPORTANCE**

35 Individual bacterial genomes can have dozens of small non-coding RNAs with largely unexplored  
36 regulatory functions. Although bacterial sRNAs influence a wide range of biological processes,  
37 including antibiotic resistance and pathogenicity, our current understanding of sRNA-mediated  
38 regulation is far from complete. Most of the available information is restricted to a few well-  
39 studied bacterial species; and even in those species, only partial sets of sRNA targets have been  
40 characterized in detail. To close this information gap, we developed a computational strategy  
41 that takes advantage of available transcriptional data and knowledge about validated and  
42 putative sRNA-mRNA interactions. Our approach facilitates the identification of experimentally  
43 supported novel interactions while filtering out false positives. Due to its data-driven nature, our  
44 method emerges as an ideal strategy to identify biologically relevant interactions among lists of  
45 candidate sRNA-target pairs predicted *in silico* from sequence analysis or derived from sRNA-  
46 mRNA binding experiments.

47

## 48 **INTRODUCTION**

49 Although bacterial gene regulation has been primarily investigated at the transcription level,  
50 recent studies have confirmed the importance of small non-coding RNAs (sRNAs) as post-  
51 transcriptional regulators (1–5). Via complementary base pairing to their targets, bacterial sRNAs  
52 regulate transcript processing, stability and translation into proteins (3–5). sRNA binding  
53 promotes conformational changes in mRNA secondary structure thus modulating recognition by  
54 molecular complexes such as ribosomes and ribonucleases (3). Chromosome-encoded sRNAs can  
55 be classified as either trans-encoded (when they regulate genes regardless of their chromosomal  
56 location) or cis-encoded (when they solely regulate the expression of adjacent genes) (3, 6).  
57 Here, we focus on trans-encoded sRNAs affecting mRNA stability. Importantly, the list of sRNA-  
58 controlled cellular functions is broad (ranging from metabolism to virulence) and is continuously  
59 expanding with the analysis of new microbial species (5, 7). Because transcription factors (TFs)  
60 and sRNAs can share targets or even regulate each other (7), a comprehensive characterization  
61 of any bacterial gene regulatory network must incorporate both types of regulators (as has been  
62 explored for regulatory networks in eukaryotes) (8).

63

64 The role of trans-encoded sRNAs has been mainly investigated in Gram-negative bacteria (5).  
65 *Escherichia coli* is currently the bacterial species with the highest number of experimentally  
66 supported sRNA-mRNA interactions (102 known interactions according to Pain *et al.*, 2015) (9).  
67 This set contains 22 sRNAs with at least one experimentally supported target (9); however, this  
68 is only a fraction of the array of potential regulatory RNAs encoded in the *E.coli* genome (10, 11).  
69 The number of characterized sRNA targets is unevenly distributed as only eight out of 22 sRNA

70 regulons contain five or more members. Accurate and comprehensive detection of sRNA-mRNA  
71 interactions is challenging. The outcome of transcriptomics and proteomics experiments is highly  
72 dependent on the proper selection of conditions in which sRNAs are regulatory active (12),  
73 further complicating experimental designs. Moreover, computational methods (based on  
74 genome sequence and hybridization energy) predicting sRNA-mRNA interactions are fast and  
75 inexpensive but have a high false positive rate and may fail to recall known targets (5, 9).

76

77 Network inference methods have been implemented to study sRNA-mediated regulation. Modi  
78 and collaborators used Context Likelihood of Relatedness (CLR) on transcriptional profiles of  
79 sRNAs and genes to infer an *E. coli* sRNA regulatory network (13, 14). Modi et al. correctly  
80 predicted *lrp*, encoding a global transcriptional regulator, as a target of the GcvB sRNA. A second  
81 study exploited gene co-regulation to infer another *E. coli* sRNA network (15). In both studies,  
82 the recall of known sRNA-mRNA interactions was limited and the accuracy of novel predictions  
83 was not systematically evaluated (15).

84

85 We hypothesize that, contrary to what was assumed in previous sRNA network inference  
86 strategies, sRNA levels might not be an adequate proxy for their regulatory activity in large  
87 transcriptomic datasets. In multiple species, RNA chaperones (such as Hfq in *E. coli*) promotes  
88 the interaction between sRNAs and their target mRNAs (4, 5, 16). Moreover, ribonucleases may  
89 be required to activate sRNAs by processing (e.g. RoxS, a *Bacillus subtilis* sRNA, only interacts  
90 with the *sucCD* mRNA after it has been truncated by RNase Y) (17). Furthermore, the regulatory  
91 contribution of a sRNA becomes negligible when the concentration of its targets significantly

92 exceeds its own (18, 19). In this work, we address the complexity of sRNA-mediated regulation  
93 by estimating sRNA regulatory activities from transcriptional profiles of their known and  
94 candidate targets. We then use the estimated sRNA activities as input to our network inference  
95 tool to generate models of gene regulation for four bacterial species. We show, with substantial  
96 experimental support from independent studies, that our pipeline outperforms previous  
97 network-oriented efforts, detects novel sRNA-mRNA interactions, and complements RNA-RNA  
98 interaction prediction methods by discriminating between true and false targets. This work  
99 illustrates how our computational strategy can help researchers selecting candidate interactions  
100 for experimental validation while focusing on the most likely sRNA targets.

101

## 102 **RESULTS AND DISCUSSION**

103 We inferred bacterial sRNA regulons from transcriptomics data using either the Inferelator (20),  
104 our network inference tool, or CLR, an alternative algorithm (13, 21). Because our approach  
105 mines transcriptomics data, it is designed to identify sRNA-mRNA interactions that change mRNA  
106 stability (those that only modify translational efficiency would likely be overlooked). A set of  
107 experimentally supported sRNA-mRNA interactions (also referred to as sRNAs priors) was used  
108 for estimating sRNA regulatory activities (*see below*). We used *E. coli* data to benchmark our  
109 pipeline and restricted our analysis to eight sRNAs with experimentally supported targets (**Table**  
110 **1**). We repeated this strategy with *B. subtilis*, *Staphylococcus aureus* and *Pseudomonas*  
111 *aeruginosa*. sRNA priors used for estimating sRNA activities are listed in **Table S1**. We relied on  
112 publicly available experimental data for assessing the accuracy of the inferred sRNA regulons.

113

### 114 **sRNA transcript level is not a good proxy for regulatory activity in a network inference context.**

115 The transcriptional profiles of sRNAs have commonly been used as proxies for their regulatory  
116 activities (14, 15). However, we suspected that a sRNA transcriptional profile would not typically  
117 match its regulatory activity due to the contributions of factors (such as RNA chaperones,  
118 ribonucleases, RNA sponges, target mRNA concentration) that influence the outcome of sRNA-  
119 mediated regulation. An analogous observation has been made for TFs, where TF activity can be  
120 modulated by post-translational modifications such as phosphorylation or the presence of co-  
121 factors (22, 23). To examine the relation between the transcription level of a sRNA and its  
122 regulatory activity in *E. coli*, we plotted the transcriptional profile of several sRNAs against the  
123 average transcription profile of their experimentally supported targets (**Fig. 1A-B & Fig. S1 A-E**).

124 In agreement with our expectations, sRNA transcript levels exhibited only a weak linear relation  
125 with their targets (left panels). This observation holds true for other species (**Fig. S1 F-G**). For  
126 instance, we observed similar patterns for two regulators of the iron-sparing response, FsrA in *B.*  
127 *subtilis* and S596 in *S. aureus*, functional analogs of *E. coli* RyhB (24–26). These findings support  
128 the notion that transcript levels are often a sub-optimal proxy for sRNA regulatory activity in the  
129 context of network inference.

130

### 131 **Estimating sRNA regulatory activity**

132 To estimate sRNA regulatory activity (SRA), we used the transcription profiles of their  
133 experimentally supported targets. Conceptually, this is analogous to relying on a reporter gene  
134 to measure the activity of a given sRNA, with the distinction that every presumed target of the  
135 sRNA is considered in the estimation (27). We have successfully used a similar approach to  
136 estimate the activities of TFs and thereby expanded the transcriptional network model of *B.*  
137 *subtilis* (27). We checked the relation between estimated SRAs and the transcription profile of  
138 their priors (**Fig. 1A-B & Fig. S1 A-E**; right panels). We observed, as expected based on our  
139 previous work (27), a stronger linear relationship between genes and their known sRNA  
140 regulators than with raw sRNA transcript levels. We noted the same trend for functionally related  
141 sRNAs in *B. subtilis* and *S. aureus* (**Fig. S1 E-G**). Additionally, significantly stronger anti-correlation  
142 (expected due to the repressive nature of sRNA-mRNA interactions used as priors) were found  
143 between sRNAs activities and their targets compared to correlations between corresponding  
144 sRNA transcript levels and their targets (**Fig. 1C**).

145



146 The better correlation between sRNA activity and transcriptional profile of sRNA targets led us to  
147 incorporate SRAs into our inference pipeline in the same manner we did for TFs. Importantly,  
148 estimated SRAs can be used for network inference even when the transcriptomic dataset does  
149 not contain information about sRNAs of interest, as frequently observed for microarrays-  
150 collected datasets. One example is shown in **Fig. 1D**. Despite the absence of FnrS in the  
151 transcriptomic dataset, its activity was estimated using ten priors. In our workflow, the only  
152 requirement for including a sRNA as potential regulator is a set of experimentally supported or  
153 candidate targets, whose transcriptional profiles are available in the analyzed transcriptomics  
154 dataset.

155

## 156 **General strategy**

157 Our network inference pipeline is illustrated in **Fig. 2**. First, we used a transcriptomics dataset  
158 (from the Many Microbe Microarrays database (28) or any equivalent repository) and a set of  
159 experimentally supported TF-gene and sRNA-mRNA interactions (from RegulonDB (29),  
160 RegPrecise (30), or equivalent), referred to here as the prior network, to estimate the regulatory  
161 activities of TFs (TFAs) and sRNAs (SRAs). Next, we used the estimated activities (TFAs and SRAs),  
162 the transcriptomics dataset, and the prior network to simultaneously infer the TF-controlled  
163 network and the sRNA-controlled network using Bayesian regression with the Inferelator (*see*  
164 *methods*)(20, 27). Interactions not included in the prior network were considered novel. Inclusion  
165 of a prior transcriptional network, which is much larger than the prior sRNA network, allowed us  
166 to define thresholds (calibrated using desired precision values) for selecting the interactions that  
167 should be kept in the final networks. Inclusion of TFs also prevented model over-fitting due to

168 an incomplete set of regulators and interactions to explore. Additionally, the simultaneous  
169 inference of the transcriptional and post-transcriptional networks enabled us to study  
170 connections between the two regulatory layers.

171

172 **Our strategy improves performance, recovers known interactions and predicts novel sRNA-**  
173 **mRNA interactions.**

174 We compared the performance of the Inferelator (using a *Bayesian Best Subset Regression-BSSR*)  
175 and mixed-CLR, with and without incorporating sRNA activities (SRA). For each method, the  
176 number of predicted mRNA targets per sRNA versus the number of predicted targets with  
177 experimental support is shown in **Fig. 3A**. Importantly, genes used as priors for sRNA activity  
178 estimation were removed from the set of predicted targets because they tend to occupy high  
179 positions in the predictions ranking. FnrS was not considered in this analysis because its  
180 transcriptional profile was missing from the transcriptomic dataset. Thus, it cannot be included  
181 as a regulator in methods that use transcriptional profiles as proxy for activity. We deemed a  
182 predicted target to be experimentally supported if it was differentially expressed in  
183 transcriptional profiling experiments overexpressing or deleting its putative sRNA regulator  
184 (according to the criteria established in the corresponding publication, except for Spf, see  
185 *methods*). Additionally, a sRNA-mRNA interaction was considered experimentally supported  
186 when the predicted target was part of an operon that contains differentially expressed genes.  
187 For RyhB, available ribosome profiling data was also considered in evaluating experimental  
188 support (31). The sets of candidate sRNA targets identified with transcriptomic experiments  
189 contain genes whose expression is (directly or indirectly) affected by the sRNA of interest.

190 Therefore, the rank of differentially expressed genes in the list of predicted sRNA targets informs  
191 about the performance of our strategy (10). We ranked sRNA-mRNA interactions based on the  
192 confidence score computed by the Inferelator (*see methods*). When we analyzed the top 20  
193 predictions per sRNA (for the seven *E. coli* sRNAs that were considered), we observed that among  
194 the 140 predictions made by the Inferelator with sRNA activities (Inferelator.SRA), 28 were  
195 experimentally supported (25 for mixed-CLR). By contrast, the Inferelator without sRNA activities  
196 only predicted eight experimentally supported targets (four for mixed-CLR). Inferelator.SRA  
197 performed best for Spf (ten supported targets in the top 20 predictions) and GcvB (nine  
198 supported targets). There was at least one supported target for all sRNAs except RybB and MicA.  
199 In general, we observed that incorporation of sRNA activities consistently improved the detection  
200 power of both network inference tools [in **Fig. 3A**: green and blue lines (with SRAs) vs. purple and  
201 orange lines (without SRAs)].

202  
203 The inferred *E. coli* sRNA network from the Inferelator run with sRNA activities (BBSR.SRA)  
204 described above is shown in **Fig. 3B**. Limited overlap was observed between the inferred sRNA  
205 network and the TF network. Only 19% of sRNA-regulated genes were predicted as targets of one  
206 or more TFs. Despite 41% of genes having two or more regulators in the prior network, expression  
207 of most genes was explained as the function of a single regulator's activity (either a TF or a sRNA).  
208 We found multiple cases in which the regulatory influence of a sRNA surpassed the estimated  
209 influence of several TFs targeting the same gene. For example, according to the prior network,  
210 *marA* is regulated by five TFs (AcrR, CpxR, Fis, Rob, SoxS) and one sRNA (FnrS). Only the  
211 interactions between *marA* and AcrR and FnrS were recalled into the final model. For genes

212 predicted to be regulated by both TFs and sRNAs in the inferred network (*sdhA*, *ompC*, *cysC*,  
213 among other targets), TFs were commonly the most influential regulator. In fact, we observed  
214 that on average the influence of sRNAs on expression of their targets is subtler than the one  
215 exerted by TFs (**Fig. 3C**). This finding is in agreement with the view of sRNAs as fine tuners of gene  
216 expression (3). When we inferred an alternative model (with an Inferelator run in which sRNAs  
217 were not considered as potential regulators), 90% of the genes exclusively regulated by sRNAs in  
218 our original network (**Fig. 3B**) lacked regulatory hypotheses (data not shown). This finding  
219 underscores the importance of sRNAs for fine tuning of gene expression, and it demonstrates  
220 that inclusion of sRNAs as regulators expands the models of gene regulation in bacteria.

221

222 The accuracy of inferred sRNA regulons was assessed using experimental data from previously  
223 published studies (including transcriptional profiling, ribosome profiling, and sRNA-mRNA  
224 binding data). Experimental support for novel targets and entire sRNA regulons inferred with our  
225 strategy is shown in **Fig. 3D**. Thirty-eight sRNA-mRNA interactions from the prior network were  
226 included in the final model (for a total recall of 0.51). The average recall per sRNA regulon was  
227 0.55 and the highest recall (1.0) was obtained for CyaR. In addition to the recovered priors, the  
228 inferred sRNA network contained 61 novel interactions. 29 out of these 61 novel predictions  
229 (0.48) were experimentally supported. Per regulon, the average experimental support for novel  
230 predictions was 0.47, which increased to 0.71 when considering both novel predictions and  
231 recovered priors. The limited increase in size for some sRNA regulons is consistent with previous  
232 observations that regulators with the lowest number of priors tend to have the lowest number  
233 of novel predictions because regulator's activity cannot be estimated with precision (27). Failure

234 to recall MicA targets is likely a consequence of the weak correlation between estimated MicA  
235 activity and the transcription profiles of its known targets (**Fig. S1C**). In future applications, the  
236 detection power of our pipeline will be improved by expanding the set of priors (for example, by  
237 including every gene differentially expressed in transcriptional profiling experiments). In the  
238 above analysis, we intentionally left out some of the potential sRNA targets to estimate the  
239 accuracy of our pipeline. In conclusion, integration of estimated sRNA activities in the network  
240 inference procedure greatly improves the ability to detect additional experimentally supported  
241 sRNA-mRNA interactions.

242

#### 243 **Robustness to incorrect prior information.**

244 We originally tested our approach with a set of priors that only included experimentally  
245 supported sRNA-mRNA interactions. However, in a more realistic scenario, researchers may  
246 compile priors from heterogenous sources, and a mix of true and false interactions is expected.  
247 Previously, we showed that the Inferelator is robust to noisy priors (up to 1:10 ratio of true: false  
248 priors) (27). To confirm this result in the context of sRNAs, we assessed the robustness of our  
249 pipeline in terms of the experimental support of priors included in the final models. We added  
250 different amounts of false interactions to the sRNA priors and ran the pipeline with those noisy  
251 priors. We found that our method efficiently distinguishes true from false interactions (**Fig. 3E**).  
252 Specifically, we determined how many priors recovered as putative targets were experimentally  
253 supported. Although the total number of recovered priors is lower than in the original run  
254 without false priors (**Fig. S2**), the proportion of recovered priors with experimental support still

255 exceeded the ratio expected from a random selection (gray stars in **Fig 3E**). This finding suggests  
256 that our pipeline successfully filters out priors not supported by the transcriptional data (20, 27).

257

### 258 **Combining sequence-based predictions of mRNA-sRNA interactions with transcriptomics data** 259 **using the *Inferelator***

260 We showed above that the Inferelator is robust to the presence of false negatives and positives  
261 in the network priors (**Fig. 3**), so we exploited this property to separate true from false positives  
262 among sRNA-mRNA interactions that were predicted computationally. The strategy described  
263 below combines a sequence-based prediction step with a transcriptional data-driven filtering  
264 step (**Fig. 4A**). For any sRNA of interest, we first build a set of priors using a sRNA-mRNA  
265 interaction prediction method. Then, we run the Inferelator and recover the most likely targets  
266 of that sRNA. We chose CopraRNA (32) for the assembly of the sRNAs priors because it is a state  
267 of the art RNA-RNA interaction prediction method (9). It also offers an excellent framework to  
268 evaluate the potential of our method. A standard CopraRNA output contains 100 predictions  
269 (ranked by the associated p-values). CopraRNA performs a functional enrichment analysis among  
270 predicted targets. There is, however, no standard strategy to select which putative interactions  
271 should be investigated further. Any CopraRNA output will most likely include false positives that  
272 cannot easily be discarded. Therefore, our pipeline helps in selecting the most biologically  
273 relevant interactions among CopraRNA predictions.

274

275 We focused our analysis on the CopraRNA predictions for RyhB, GcvB and Spf. These sRNAs  
276 regulate different cellular processes and transcriptional profiling data indicate that each may

277 directly or indirectly regulate dozens of genes. We hypothesized that if we used CopraRNA  
278 predictions as priors, our downstream activity estimation and network inference method would  
279 further distinguish between true and false positives and thus detect novel interactions. From the  
280 available transcriptional profiling data, we estimated that about 25% of the CopraRNA  
281 predictions are experimentally supported (i.e. differentially expressed when expression of the  
282 corresponding sRNA is perturbed or detection of physical interaction between sRNA and  
283 predicted targets; **Table S2**). To avoid a bias in our analyses, we compared five filtering strategies  
284 to reduce the proportion of unsupported priors in the initial set of CopraRNA predictions (**Table**  
285 **S2**). For each sRNA, we ran our pipeline using the following sets of priors: i) the full set of  
286 CopraRNA predictions. ii) targets with p-values  $\leq 0.01$ . iii) targets associated with enriched  
287 functional terms. iv) the intersection of (ii) and (iii). v) the union of (ii) and (iii). vi) the union of  
288 the top 15 targets based on p-value (suggested in the original CopraRNA paper) and (iv).  
289 Experimental support rate of generated priors ranges from 0.17 to 0.73.

290

291 Initially, we compared the experimental support rates of the multiple sets of CopraRNA priors  
292 (generated with the above filtering strategies) to the inferred sRNA regulons. We observed that,  
293 in general, running the Inferelator dramatically shrank the initial set of priors (**Table S2**), while  
294 the experimental support rate increased significantly (**Fig. 4B**). This result supports the  
295 hypothesis that our method filters out false priors. Remarkably, we identified 26 sRNA-mRNAs  
296 predicted interactions that are most likely true additions to the corresponding *E. coli* sRNA  
297 regulons (**Table 2**). Each of the sRNA-mRNA interactions is supported by the transcriptional  
298 compendium analyzed with our network inference strategy, and independent experimental data

299 (physical binding, transcriptional profiling or validation in a closely related species such as  
300 *Salmonella*). For example, the RyhB-*cheY* interaction is supported by the physical interaction  
301 between RyhB and *cheY* in *E. coli* and significant up-regulation of *cheY* in a *Salmonella* strain  
302 missing one of its two RyhB genes (10, 33). Another interesting target of *E. coli* RyhB is *mrp*. This  
303 interaction is supported by: 1) physical interaction between RyhB and *mrp* in *E. coli* (10); 2)  
304 increased translation rate of *mrp* in a RyhB deletion *E. coli* strain (31); and 3) the fact that *mrp*  
305 encodes an iron binding protein, which is consistent with the well-known role of RyhB in the iron  
306 sparing response (24). Therefore, the interactions listed in **Table 2** constitute a promising starting  
307 point for future experimental validation efforts.

308

309 Among the six sets of priors that we tested for RyhB, the one containing 38 genes associated with  
310 enriched functional terms gave the best results (**Fig. 4C**). Not only were all six priors included in  
311 the inferred network experimentally supported, but nine additional targets were predicted. Four  
312 out of the nine novel predictions had experimental support. Two additional targets (*sucB* and  
313 *sucD*) are in the same operon as *sucA*, one of the novel targets supported by binding data. Thus,  
314 the inferred RyhB regulon has a 0.67 accuracy (i.e. 10 out of 15 predicted targets are  
315 experimentally supported). The novel predictions (not present in the priors) included genes  
316 involved in respiration (*nuoA* and *nuoE*) and the citric acid (TCA) cycle (*sucA-sucB-sucD*), two  
317 cellular processes already associated with RyhB.

318

319 The five largest sRNA regulons inferred using CopraRNA-derived priors were for GcvB. Each of  
320 these GcvB regulons had 46 or more predicted targets (**Table S2**). This large size agrees with the



321 global regulatory role of GcvB (34). **Fig. 4D** shows the inferred GcvB regulon when CopraRNA  
322 predictions with p-value  $\leq 0.01$  were used as priors. Eleven priors (out of 46) were recovered as  
323 putative targets in the inferred network. Nine out of those eleven priors had experimental  
324 support. In addition, 39 genes were predicted as novel targets. Although some of the novel  
325 predictions for GcvB lacked experimental support (23 out of 39), we identified multiple novel  
326 targets that show the potential of our approach. For instance, *nlpA* (validated as a GcvB target in  
327 2018) (34) was predicted as a novel GcvB target. In fact, *nlpA* was predicted as a GcvB target in  
328 five of the six inferred GcvB regulons. Additionally, *asd*, *hisJ*, *hisQ*, *hcxB* and *dcyD* were novel  
329 predictions supported by physical binding data (10). The interaction between GcvB and *dcyD* was  
330 experimentally validated in *Salmonella* (35). *hisJ* and *hisQ* are in the same operon as *argT*, a  
331 known GcvB target included in the prior set. Four members of the *dpp* operon, involved in  
332 peptide transport (36) were predicted as additional GcvB targets; however, *dppA*, the first gene  
333 in the operon, was present among the priors. The inferred GcvB regulon included other six genes  
334 that belong to operons with known GcvB targets but lacked experimental support (dotted lines  
335 in **Fig. 4D**).

336

337 Predictions for Spf illustrate the performance of our method when a set of genes with low  
338 experimental support rate is used as priors. Spf had the lowest experimental support rate in each  
339 of the six versions of CopraRNA-derived priors (**Table S2**). **Fig 4E** shows the Spf regulon inferred  
340 using as priors the 23 genes predicted as Spf targets by CopraRNA with a p-value  $\leq 0.01$  and  
341 associated with enriched terms. Only eight of these 23 priors were experimentally supported.  
342 Yet, four out of the six recovered priors had experimental support. One of the novel targets was

343 *sthA*, an experimentally validated target of Spf (37). An interesting prediction for Spf was *mdh*.  
344 The Spf-*mdh* interaction is supported by physical binding data and it is in line with the role of Spf  
345 in carbon metabolism (10, 37).

346

### 347 **Expanding the partially characterized sRNA regulons for GcvB, Spf, PrrF and FsrA**

348 Here, we describe four examples to highlight how our pipeline successfully identified 15 novel  
349 sRNA-mRNA interactions with experimental support in *E. coli*, *P. aeruginosa* and *B. subtilis*. The  
350 predicted *E. coli* Spf regulon (from the inferred sRNA network in **Fig. 3**) is shown in **Fig. 5A**. Spf  
351 mainly controls genes associated with sugar metabolism and transport (37). Four (out of 12)  
352 priors were recovered as targets. Five additional targets were predicted, including *maeB*, which  
353 encodes a NADP-dependent malate dehydrogenase that converts malate into pyruvate (38).  
354 Originally, this gene was not reported as differentially expressed in a *spf* over-expressing strain  
355 (37). However, when we reanalyzed the transcriptional data with a Bayesian t-test, we found that  
356 *maeB* was significantly down-regulated in the over-expression strain. Moreover, a physical  
357 interaction between Spf and *maeB* mRNA was recently reported by Melamed et al (10). We  
358 conclude that *maeB* is a true novel Spf target. The NAD-dependent malate dehydrogenase of *E.*  
359 *coli*, *maeA*, is a known Spf target (37, 38). Interaction of Spf with *maeB* and *maeA* (located in  
360 independent transcriptional units) indicates that Spf can completely block the generation of  
361 pyruvate from malate by repressing both types of malate dehydrogenases. Another novel  
362 predicted target for Spf was the *mgl* operon. *mglB* encodes a galactose ABC transporter (39) and  
363 it was significantly down-regulated in the *spf* over-expressing strain (exclusively detected in our  
364 analysis). *mglB* is predicted as a Spf target by CopraRNA (**Fig. 4E**) and the Spf-*mglB* interaction

365 was recently validated in *S. enterica* (40). Considering that *E. coli* and *S. enterica* are  
366 phylogenetically close, we conclude that the *mgI* operon is also a true Spf target in *E. coli*. This  
367 implies that Spf represses galactose metabolism (through the repression of members of the *gal*  
368 operon) (41) and transport of galactose into the cell (by repressing the *mgI* operon). The fifth  
369 novel Spf target was *sdhA*. This prediction is supported by the validated interaction between Spf  
370 and *sdhC*, the first gene of the *sdh* operon (42). Desnoyers and Massé found that Spf primarily  
371 regulates the *sdh* operon at the translational level. Thus, the inclusion of the Spf-*sdh* interaction  
372 in our model indicates either that our approach can detect interactions producing subtle changes  
373 in mRNA stability (indeed, Desnoyers et al. observed degradation of the *sdh* mRNA 30 mins after  
374 Spf induction) or that Spf induces a faster degradation of the *sdh* polycistronic mRNA in a still  
375 unidentified condition. Overall, we found that all five of the Spf novel targets were experimentally  
376 supported.

377

378 The inferred *E. coli* GcvB regulon, using the compiled set of experimentally supported sRNA  
379 priors, is shown in **Fig. 5B**. Our model expands the role of GcvB in the regulation of amino acid  
380 biosynthesis and transport. Six (out of nine) priors were recovered as GcvB targets and 27  
381 additional targets were predicted. Ten of the novel targets (not included in the prior sRNA  
382 network) were supported by transcriptional profiling data. Among these novel targets, several  
383 have been validated, i.e. *serA* [validated in *S. enterica* (34, 35)]; three members of the *dpp* operon  
384 (*dppA*, *dppB*, *dppC*) (43); four members of the *livKHMGF* operon (*livF*, *livH*, *livM* and *livK*), and  
385 two members of the *argT-hisJQMP* operon (*hisJ* and *hisQ*). The set of novel GcvB targets has  
386 significant experimental support from physical binding data (10) (12 out 27 new targets, for a

387 hyper-geometric test  $p$ -value=  $2.7 \times 10^{-11}$ ). Notably, there were five novel targets (*asd*, *kgtP*, *nlpA*,  
388 *pheL*, *yhjE*) not supported by transcriptomics data, but detected *in vivo* by Margalit and  
389 collaborators as physically interacting with GcvB (10). Two predicted GcvB targets (*thrC* and *cysC*)  
390 were indirectly supported by binding data (10). GcvB interacts with *thrL* (10), the leader peptide  
391 sequence of the *thr* operon that contains *thrC*. GcvB physically interacts with *cysB* (10), encoding  
392 the transcriptional regulator of *cysC*. To the best of our knowledge, assigning to the GcvB regulon  
393 *asd* (also predicted as a target when CopraRNA-derived priors were used), and *kgtP*, which  
394 respectively encode an aspartate-semialdehyde dehydrogenase and an  $\alpha$ -ketoglutarate  $H^+$   
395 symporter (44, 45), is only supported by our model and physical binding data collected in (10).  
396 One of the main challenges of new technologies capturing physical binding between sRNAs and  
397 mRNAs [e.g. RNA Interaction by ligation and Sequencing (10), *in vivo* UV crosslinking with RNA  
398 deep sequencing (40), MS2-Affinity Purification coupled with RNA Sequencing (34)] is to identify  
399 whether those interactions do actually influence mRNA stability and translation rate (10). Thus,  
400 our approach constitutes a complementary tool to identify which interactions, among the  
401 hundreds of detected binding events, have functional relevance.

402

403 PrrF1 and PrrF2 are two iron-responsive sRNAs of *P. aeruginosa* and function as analogs of *E. coli*  
404 RyhB (46). Both sRNAs are transcriptionally repressed by Fur under iron rich conditions (46). PrrF1  
405 and PrrF2 are almost identical at the sequence level and are adjacent on the *P. aeruginosa*  
406 chromosome. Thus, they were considered as a single regulator (PrrF) in our analysis. The  
407 predicted PrrF regulon is shown in **Fig. 5C**. All eleven priors were recalled in the final model and  
408 the inferred PrrF regulon included 10 novel targets. Five genes (*antR*, *catA*, *catC*, PA2682 and

409 *sdhC*) were significantly up-regulated in a wild-type *P. aeruginosa* strain grown in iron rich  
410 medium (compared to the WT grown under iron poor conditions, i.e. when PrrF is active) and in  
411 the double *prfF1-prfF2* deletion mutant (compared to the WT strain) (46). We considered those  
412 five targets to be experimentally supported. Independent regulation of *antR* and its target  
413 *antABC* operon was validated in (47). *sdhC* can also be considered a validated target per (46).  
414 *gltA*, which encodes an enzyme involved in the TCA cycle, was significantly up-regulated in the  
415 WT strain grown in iron rich medium vs. the iron poor condition (47). Since PrrFs are repressed  
416 at high iron concentrations, the observed up-regulation of *gltA* supports our prediction.  
417 Moreover, *gltA* is a known target of FsrA (a functional analog of PrrF) in *B. subtilis* (48). For the  
418 reasons described above and the involvement of known PrrF targets in the TCA cycle, we  
419 considered *gltA* to be a probable PrrF target. We hypothesize that the novel targets *nuoF*, *nuoI*  
420 and PA4430 are likely regulated by PrrF despite not being supported by available transcriptional  
421 profiling data. We base our conclusion on the following observations: first, interaction of PrrF  
422 with the *nuo* operon and the PA4427-PA4428-PA4429-PA4430-PA4431 operon is supported by  
423 the PrrF1-*nuoK* and PrrF1-PA4431 interactions predicted by CopraRNA. Second, the predicted  
424 PrrF-*nuo* interaction is highly probable considering that: i) the *nuo* operon is regulated by RyhB  
425 in *E. coli*; ii) PrrF and RyhB have multiple targets in common (e.g. the *sdh* operon, *acnA* and *acnB*).  
426 The same is true for the PrrF-PA4430 interaction. PA4430 putatively encodes cytochrome b and  
427 RyhB regulates multiple cytochrome encoding genes. Third, we considered as differentially  
428 expressed the genes labeled as such in (47). In that study, a 0.0001 p-value threshold was used  
429 to define differential expression. The stringent p-value threshold may account for categorizing  
430 PA4430 and the *nuo* operon as not differentially expressed. Hence, only one out of the 10 novel

431 PrrF targets predicted by the model (PA4570) appears to be a false positive. Other putative  
432 targets are supported either by experimental data, computational RNA-RNA predictions, or  
433 conservation of PrrF targets in other species.

434

435 FsrA is the functional analog of PrrF in *B. subtilis* (25). **Fig. 5D** shows the inferred FsrA regulon.  
436 The predicted regulon contains eight (out of twelve) priors and seven novel target genes. In  
437 agreement with our model, three novel targets (*odhA*, *odhB* and *pmi*) are among the FsrA targets  
438 predicted by CopraRNA. *odhA* and *odhB* form an operon and encode genes involved in the TCA  
439 cycle (49). In support of the predicted FsrA-*odhA* interaction, analysis of 2D protein gels showed  
440 that average fold-change of the OdhA protein level is 1.78 in the double *fsrA-fur* deletion mutant  
441 respect to the WT strain (25). Furthermore, *odhA* and *odhB* mRNA levels were up-regulated (1.68  
442 and 1.91 mean fold-changes, respectively) in the double *fsrA-fur* deletion mutant when  
443 compared to the *fur* single deletion mutant (48). The interaction between FsrA and *ysmA*, an  
444 uncharacterized gene, is supported by the similarity between *ysmA* transcription profile and that  
445 of known FsrA targets (*leuC* and *sdh* operon) (48). Additionally, *ysmA* is up-regulated (3.78 mean  
446 fold-change) in the double *fsrA-fur* deletion mutant with respect to the *fur* deletion mutant (48).  
447 The interaction between FsrA and the *sucC-sucD* operon is supported by up-regulation (2.46  
448 mean fold-change) of *sucD* in the double *fsrA-fur* deletion mutant compared to the *fur* single  
449 deletion mutant (48) and down-regulation (0.53 mean fold-change) of *sucC* in the *fur* single  
450 deletion mutant compared to the WT (48). Two predicted targets of FsrA (*sucC* and *ppnKB*) are  
451 validated targets of RoxS, another trans-encoded sRNA of *B. subtilis* (17). Interestingly,  
452 expression of multiple genes regulated by Fur, the transcriptional repressor of FsrA, also appear

453 to be influenced by RoxS (17). This may suggest a functional connection between RoxS and FsrA.  
454 However, we did not find any data in support of the predicted FsrA-*ppnKB* interaction. Follow up  
455 experiments are required to obtain a definitive answer. In summary, interactions between FsrA  
456 and the *odhA-odhB* and *sucC-sucD* transcripts are particularly promising due to the role played  
457 by these genes in the TCA cycle, a previously known target of FsrA (*sdh* operon) (25, 48).

458

459

460

461

462

463 **CONCLUSIONS**

464

465 We have developed a new computational pipeline that integrates estimates of TF and sRNA  
466 activities with a well-tested network model selection procedure for inferring bacterial sRNA  
467 regulons. Our work shows that using transcriptional profiles of sRNAs as proxy for their activity  
468 in traditional network inference approaches is less than optimal, because it does not account for  
469 the fact that sRNA activity can be influenced by factors such as RNA chaperones, ribonucleases  
470 and sRNA: targets ratio (18, 19). Our findings further demonstrates that the need to estimate  
471 regulatory activity of non-coding RNAs is not exclusive to eukaryotic systems (50) but relevant  
472 for all types of regulatory non-coding RNAs that require substantial processing and are involved  
473 in multiple interactions (such as micro-RNAs and bacterial sRNAs).

474

475 Our results indicate that integration of sRNA activities in network inference pipelines significantly  
476 improves their prediction power (**Fig. 3A**) and our strategy significantly outperforms previous  
477 network inference efforts. Importantly, this work complements sRNA-mRNA prediction methods  
478 based on sequencing analysis and the recently developed technologies for detecting physical  
479 interactions between sRNAs and mRNAs (**Fig. 4**). Our computational approach identified a total  
480 of 39 novel sRNA-mRNA interactions with experimental support in Gram-positive and Gram-  
481 negative species (*E. coli*, *P. aeruginosa* and *B. subtilis*). In addition, we showed that our strategy  
482 is robust to false positives and negatives, thus allowing the accurate detection of novel sRNA  
483 targets. Importantly, our method is especially well suited to removing the many false positives  
484 present in sequence-based computationally predicted sRNA-mRNA interactions. Our pipeline can



485 both expand current sRNA regulons and serve as a first approach to prioritize the study of  
486 predicted targets of uncharacterized sRNAs.

487

488 The sRNA regulons inferred in this study increase by 40% the number of experimentally  
489 supported interactions originally compiled for estimating *E. coli* sRNA activities. We uncovered  
490 novel experimentally supported sRNA-mRNA interactions (**Fig. 4, Fig. 5A-B and Table S2**) involved  
491 in chemotaxis and oxidation-reduction pathways. Thus, our work extends the contribution of  
492 sRNA-mediated regulation in these processes. Simultaneously, we discovered how a single sRNA  
493 (Spf) can repress all branches of a metabolic reaction (i.e. conversion of malate to pyruvate in  
494 NAD and NADP dependent fashion). Analysis of the inferred Spf regulon also suggested how  
495 sRNAs can repress the consumption of alternative sugars (i.e. galactose) by simultaneously  
496 inhibiting their catabolism and their intake. In general, our approach offered insights into the  
497 functional role of bacterial sRNAs as fine tuners of gene expression in the analyzed species.

498

499 The main limiting factor in our approach is the fact that it requires prior information (including  
500 transcriptomics data, a transcriptional network, and candidate sRNA targets). As a proof of  
501 principle, we selected bacterial species for which we could comprehensively assess the quality of  
502 the inferred models. Beyond these selected species, we believe that there is a much larger group  
503 of bacterial species (e.g. *Salmonella enterica* and *Mycobacterium tuberculosis*), whose study  
504 could benefit from the application of the strategy delineated in this work. Transcriptional  
505 compendia for approximately 20 bacterial species can be easily downloaded from the  
506 COLOMBOS database (51). Transcriptional networks can be (at least partially) reconstructed by

507 mining literature and databases that store information about experimentally supported  
508 transcriptional interactions [e.g. RegPrecise database (30)]. Finally, we show that initial sets of  
509 sRNA priors can be generated using available mRNA-sRNA interaction prediction tools (e.g.  
510 CopraRNA), genetic perturbations or with global detection of sRNA-mRNA binding events.

511

512 The applicability of our strategy will increase in the next few years as the field of bacterial sRNA-  
513 mediated regulation grows. Incorporating estimated TFs regulatory activity in network inference  
514 strategies, has led to recent improvements in the transcriptional regulatory networks of yeast  
515 (52), sex specific gene networks in *Drosophila* (53), transcriptional networks associated with  
516 cancer (54, 55) and transcriptional networks that drive differentiation of mice T lymphocytes  
517 (56). Our strategy relies on knowledge about sRNA-mRNA interactions that is already available  
518 to accurately estimate sRNA activities and to identify novel sRNA targets. Hence, we expect  
519 performance of our strategy to improve as the quality and number of confirmed sRNA-mRNA  
520 interactions continues to rise.

521

## 522 MATERIALS AND METHODS

523

### 524 *Bacterial species*

525 We inferred transcriptional regulatory networks and small non-coding RNA regulons for  
526 *Escherichia coli*, *Pseudomonas aeruginosa*, *Staphylococcus aureus* and *Bacillus subtilis*.

### 527 *Small non-coding RNA priors*

528 sRNA-mRNA interactions used as sRNAs priors for sRNA activity estimation in each species are  
529 listed in **Table S1**. For sRNA priors in *E. coli*, only one member of each operon containing multiple  
530 validated sRNA targets was considered to avoid over-representation of any operon. Because  
531 S596 is an uncharacterized sRNA of *S. aureus*, we used as S596 priors the CopraRNA-derived  
532 candidate targets selected in (26).

### 533 *Transcriptomics datasets*

534 The transcriptomics datasets used for inferring the transcriptional and sRNA networks of  
535 analyzed species are described in **Table S3**.

### 536 *Prior transcriptional networks*

537 For each species, the prior transcriptional network was constructed as a collection of  
538 experimentally supported signed (activation or repression) TF-gene interactions. The prior  
539 networks were used for estimating the regulatory activities of TFs included as potential  
540 regulators, inferring the corresponding transcriptional network and defining the final model of  
541 the inferred networks (*see below*). Sources for each species are shown in **Table S3**.

### 542 *Estimation of transcription factors and sRNAs regulatory activities*

543 Activities of potential regulators (TFs and sRNAs) were simultaneously estimated using the set of  
544 experimentally supported interactions in the prior network as described in (27). Briefly, we first

545 combined the sRNA and transcriptional prior networks into a global prior network. We  
546 represented the analyzed transcriptional dataset in matrix format (referred to as  $\mathbf{X}$ ) where each  
547 row corresponded to the transcriptional profile of a gene. Then, we applied a network  
548 component analysis (NCA; 43) to decompose  $\mathbf{X}$  in two matrices: a first matrix  $\mathbf{P}$ , which we derived  
549 from the prior network. The values in  $\mathbf{P}$  are in the  $\{0, 1, -1\}$  set, where 1 and -1 indicate activation  
550 and repression, respectively. Value in the  $P_{ij}$  entry corresponds to the interaction between gene  
551  $i$  and regulator  $j$ . The second matrix  $\mathbf{A}$  is unknown but represents the activities of regulators along  
552 the conditions in  $\mathbf{X}$ . As such, the  $A_{kl}$  entry is the activity of regulator  $k$  in condition  $l$ . In matrix  
553 notation, NCA can be stated as:  $\mathbf{X}=\mathbf{PA}$  (Eq. 1). We solved for  $\mathbf{A}$  using the pseudo-inverse of  $\mathbf{P}$  as  
554 explained in (27).

### 555 ***Inference of Transcriptional and sRNA Networks***

556 Transcriptional and sRNA networks were simultaneously inferred using Inferelator *Bayesian Best*  
557 *Subset Regression* (BBSR), as detailed in (27). The core model of the Inferelator with  
558 incorporation of TFs and sRNAs activities can be summarized as:

559  $X_{i,j} = \sum_{k \in \{TFs \cup sRNAs\}} \beta_{i,k} \hat{A}_{k,j}$  (Eq. 2), where  $X_{i,j}$  is the mRNA level of gene  $i$  in condition  $j$ ,  $\hat{A}$  is  
560 the matrix of estimated activities generated with NCA (as described above), and  $\beta_{i,k}$  indicates the  
561 effect (positive or negative) and strength of regulator  $k$ 's activity on gene  $i$ .  $\beta$  is the main output  
562 of the Inferelator. To model the sparsity of biological networks, BBSR solves for a matrix  $\beta$  where  
563 most values are zero. More details about BBSR solution can be found in (27). To avoid overfitting,  
564 we bootstrapped the input transcriptional data 20 times (we have previously observed minimal  
565 change above 20 bootstraps) (27). We averaged the  $\beta$  scores associated with each re-sampling  
566 instance into a final  $\beta$  matrix. The second output of the Inferelator, is a confidence score matrix

567 generated as explained in (27). The confidence score of an interaction indicates the likelihood of  
568 the interaction. Mixed-CLR was run using the *mi\_and\_clr.R* script in the Inferelator release,  
569 available in <https://sites.google.com/a/nyu.edu/inferelator/home>.

#### 570 ***Construction of final model of transcriptional and sRNA networks***

571 We ranked the set of all potential regulator (TF/sRNA)-gene interactions based on the associated  
572 confidence scores. We used a 0.5 precision cutoff [as previously used in (27)] to determine the  
573 set of interactions included in the final model. The confidence cutoff was defined as the score at  
574 which exactly 50% of the TF-gene and sRNA-gene interactions above the cutoff were part of the  
575 prior network.

#### 576 ***Validation of inferred sRNAs regulons***

577 For each species, we mined publicly available transcriptional profiling data, sRNA-mRNA binding  
578 data and results of other relevant experiments (such as northern blots, point mutations,  
579 translational fusions, ribosome profiling, *in-silico* predictions) for assessing the accuracy of the  
580 inferred sRNA regulons. A total of 385 candidate *E. coli* sRNA-mRNA interactions were suggested  
581 by available literature (excluding binding data). This set of potential interactions was extended  
582 to 691 with the addition of genes located in the same operons. *E. coli* operons prediction was  
583 downloaded from MicrobesOnline (58). Independent studies supporting novel sRNA-mRNA  
584 interactions discussed in the text are cited in the relevant sections.

#### 585 ***Differential expression analysis of Spf over-expressing E. coli***

586 Normalized microarray data of Spf over-expression (GEO accession GSE24875) (37) was  
587 downloaded and differential expression analysis was performed using a Bayesian T-test with  
588 Cyber-T (59). Only genes included in the *E. coli* transcriptomics data used in this study were

589 considered in the analysis. In addition, genes that were absent in any of the replicates were  
590 excluded. Finally, genes with p-values  $\leq 0.01$  were considered differentially expressed. We have  
591 successfully used this p-value threshold for analyzing *B. subtilis* data (27).

### 592 ***In-silico prediction of sRNA-mRNA interactions***

593 For sRNAs that were conserved among multiple bacterial species, precomputed predictions from  
594 the CopraRNA website (<http://rna.informatik.uni-freiburg.de/CopraRNA/Input.jsp>) were  
595 downloaded and used as priors. If CopraRNA predictions were not available for a sRNA of interest,  
596 a new run was submitted to the CopraRNA website. All CopraRNA predictions were downloaded  
597 between January and June 2016.

### 598 ***Functional enrichment analysis***

599 Enrichment analysis was performed on the DAVID website (60).

600

601 **ACKNOWLEDGEMENTS**

602 We thank Wade Winkler for critical discussions about this project and comments of the  
603 manuscript. We are grateful to Jonathan Goodson for critical reading of the manuscript. This  
604 work was supported by the Simons Foundation (RB), the National Institute of Health  
605 (5T32AI100853; R01-DK103358-01 and R01-GM112192-01 to RB) and by funds from the Zegar  
606 Family Foundation (to PE). The funders had no role in study design, data collection and  
607 interpretation, or the decision to submit the work for publication.

608

609 **AUTHORS CONTRIBUTIONS**

610 MLAO, RB and PE designed research. MLAO, CH and BS performed research. MLAO, NSB, RB  
611 and PE analyzed data. MLAO, RB and PE wrote the paper.

612 **REFERENCES**

- 613 1. Richmond CS, Glasner JD, Mau R, Jin H, Blattner FR. 1999. Genome-wide expression  
614 profiling in *Escherichia coli* K-12. *Nucleic Acids Res* 27:3821–3835.
- 615 2. Fawcett P, Eichenberger P, Losick R, Youngman P. 2000. The transcriptional profile of  
616 early to middle sporulation in *Bacillus subtilis*. *Proc Natl Acad Sci U S A* 97:8063–8.
- 617 3. Waters LS, Storz G. 2009. Regulatory RNAs in Bacteria. *Cell* 136:615–628.
- 618 4. Storz G, Vogel J, Wassarman KM. 2011. Regulation by small RNAs in bacteria: expanding  
619 frontiers. *Mol Cell* 43:880–91.
- 620 5. Wagner EGH, Romby P. 2015. Small RNAs in Bacteria and Archaea: Who They Are, What  
621 They Do, and How They Do It. *Adv Genet* 90:133–208.
- 622 6. Brantl S. 2007. Regulatory mechanisms employed by cis-encoded antisense RNAs. *Curr*  
623 *Opin Microbiol* 10:102–109.
- 624 7. Nitzan M, Rehani R, Margalit H. 2017. Integration of Bacterial Small RNAs in Regulatory  
625 Networks. *Annu Rev Biophys* 46:131–148.
- 626 8. Cheng C, Yan K-K, Hwang W, Qian J, Bhardwaj N, Rozowsky J, Lu ZJ, Niu W, Alves P, Kato  
627 M, others. 2011. Construction and analysis of an integrated regulatory network derived  
628 from high-throughput sequencing data. *PLoS Comput Biol* 7:e1002190.
- 629 9. Pain A, Ott A, Amine H, Rochat T, Bouloc P, Gautheret D. 2015. An assessment of  
630 bacterial small RNA target prediction programs. *RNA Biol* 12:509–13.
- 631 10. Melamed S, Peer A, Faigenbaum-Romm R, Gatt YE, Reiss N, Bar A, Altuvia Y, Argaman L,  
632 Margalit H. 2016. Global Mapping of Small RNA-Target Interactions in Bacteria. *Mol Cell*  
633 63:884–897.
- 634 11. Dar D, Sorek R. 2018. Bacterial noncoding RNAs excised from within protein-coding  
635 transcripts. *MBio* 9:e01730--18.
- 636 12. Durand S, Braun F, Helfer A-C, Romby P, Condon C. 2017. sRNA-mediated activation of  
637 gene expression by inhibition of 5'-3' exonucleolytic mRNA degradation. *Elife* 6:e23602.
- 638 13. Faith JJ, Hayete B, Thaden JT, Mogno I, Wierzbowski J, Cottarel G, Kasif S, Collins JJ,  
639 Gardner TS. 2007. Large-Scale Mapping and Validation of *Escherichia coli* Transcriptional  
640 Regulation from a Compendium of Expression Profiles. *PLoS Biol* 5:13.
- 641 14. Modi SR, Camacho DM, Kohanski MA, Walker GC, Collins JJ. 2011. Functional  
642 characterization of bacterial sRNAs using a network biology approach. *Proc Natl Acad Sci*  
643 108:15522–15527.
- 644 15. Ishchukov I, Wu Y, Van Puyvelde S, Vanderleyden J, Marchal K. 2014. Inferring the  
645 relation between transcriptional and posttranscriptional regulation from expression  
646 compendia. *BMC Microbiol* 14:14.
- 647 16. Brantl S, Brückner R. 2014. Small regulatory RNAs from low-GC Gram-positive bacteria.  
648 *RNA Biol* 11:443–56.
- 649 17. Durand S, Braun F, Lioliou E, Romilly C, Helfer A-C, Kuhn L, Quittot N, Nicolas P, Romby P,  
650 Condon C. 2015. A nitric oxide regulated small RNA controls expression of genes involved  
651 in redox homeostasis in *Bacillus subtilis*. *PLoS Genet* 11:e1004957.
- 652 18. Levine E, Zhang Z, Kuhlman T, Hwa T. 2007. Quantitative characteristics of gene  
653 regulation by small RNA. *PLoS Biol* 5:e229.
- 654 19. Mehta P, Goyal S, Wingreen NS. 2008. A quantitative comparison of sRNA-based and  
655 protein-based gene regulation. *Mol Syst Biol* 4:221.



- 656 20. Greenfield A, Hafemeister C, Bonneau R. 2013. Robust data-driven incorporation of prior  
657 knowledge into the inference of dynamic regulatory networks. *Bioinformatics* 29:1060–7.
- 658 21. Madar A, Greenfield A, Vanden-Eijnden E, Bonneau R. 2010. DREAM3: network inference  
659 using dynamic context likelihood of relatedness and the inferelator. *PLoS One* 5:e9803.
- 660 22. Liu Y, Beyer A, Aebersold R. 2016. On the dependency of cellular protein levels on mRNA  
661 abundance. *Cell* 165:535–550.
- 662 23. Burbulys D, Trach KA, Hoch JA. 1991. Initiation of sporulation in *B. subtilis* is controlled by  
663 a multicomponent phosphorelay. *Cell* 64:545–552.
- 664 24. Massé E, Vanderpool CK, Gottesman S. 2005. Effect of RyhB small RNA on global iron use  
665 in *Escherichia coli*. *J Bacteriol* 187:6962–71.
- 666 25. Gaballa A, Antelmann H, Aguilar C, Khakh SK, Song K-B, Smaldone GT, Helmann JD. 2008.  
667 The *Bacillus subtilis* iron-sparing response is mediated by a Fur-regulated small RNA and  
668 three small, basic proteins. *Proc Natl Acad Sci U S A* 105:11927–32.
- 669 26. Mäder U, Nicolas P, Depke M, Pané-Farré J, Debarbouille M, van der Kooi-Pol MM,  
670 Guérin C, Dérozier S, Hiron A, Jarmer H, Leduc A, Michalik S, Reilman E, Schaffer M,  
671 Schmidt F, Bessières P, Noirot P, Hecker M, Msadek T, Völker U, van Dijl JM. 2016.  
672 *Staphylococcus aureus* Transcriptome Architecture: From Laboratory to Infection-  
673 Mimicking Conditions. *PLOS Genet* 12:e1005962.
- 674 27. Arrieta-Ortiz ML, Hafemeister C, Bate AR, Chu T, Greenfield A, Shuster B, Barry SN,  
675 Gallitto M, Liu B, Kacmarczyk T, Santoriello F, Chen J, Rodrigues CD, Sato T, Rudner DZ,  
676 Driks A, Bonneau R, Eichenberger P. 2015. An experimentally supported model of the  
677 *Bacillus subtilis* global transcriptional regulatory network. *Mol Syst Biol* 11:839–839.
- 678 28. Faith JJ, Driscoll ME, Fusaro VA, Cosgrove EJ, Hayete B, Juhn FS, Schneider SJ, Gardner TS.  
679 2007. Many Microbe Microarrays Database: uniformly normalized Affymetrix compendia  
680 with structured experimental metadata. *Nucleic Acids Res* 36:D866–D870.
- 681 29. Gama-Castro S, Salgado H, Santos-Zavaleta A, Ledezma-Tejeida D, Muñoz-Rascado L,  
682 García-Sotelo JS, Alquicira-Hernández K, Martínez-Flores I, Pannier L, Castro-Mondragón  
683 JA, Medina-Rivera A, Solano-Lira H, Bonavides-Martínez C, Pérez-Rueda E, Alquicira-  
684 Hernández S, Porrón-Sotelo L, López-Fuentes A, Hernández-Koutoucheva A, Del Moral-  
685 Chávez V, Rinaldi F, Collado-Vides J. 2016. RegulonDB version 9.0: high-level integration  
686 of gene regulation, coexpression, motif clustering and beyond. *Nucleic Acids Res*  
687 44:D133-43.
- 688 30. Novichkov PS, Kazakov AE, Ravcheev DA, Leyn SA, Kovaleva GY, Sutormin RA, Kazanov  
689 MD, Riehl W, Arkin AP, Dubchak I, Rodionov DA. 2013. RegPrecise 3.0 – A resource for  
690 genome-scale exploration of transcriptional regulation in bacteria. *BMC Genomics* 14.
- 691 31. Wang J, Rennie W, Liu C, Carmack CS, Prévost K, Caron M-P, Massé E, Ding Y, Wade JT.  
692 2015. Identification of bacterial sRNA regulatory targets using ribosome profiling. *Nucleic*  
693 *Acids Res* gkv1158.
- 694 32. Wright PR, Richter a. S, Papenfort K, Mann M, Vogel J, Hess WR, Backofen R, Georg J.  
695 2013. Comparative genomics boosts target prediction for bacterial small RNAs. *Proc Natl*  
696 *Acad Sci* 110:E3487–E3496.
- 697 33. Kim JN, Kwon YM. 2013. Identification of target transcripts regulated by small RNA RyhB  
698 homologs in *Salmonella*: RyhB-2 regulates motility phenotype. *Microbiol Res* 168:621–  
699 629.

- 700 34. Lalaouna D, Eyraud A, Devinck A, Prévost K, Massé E. 2018. GcvB small RNA uses two  
701 distinct seed regions to regulate an extensive targetome. *Mol Microbiol*.
- 702 35. Sharma CM, Papenfort K, Pernitzsch SR, Mollenkopf H-J, Hinton JCD, Vogel J. 2011.  
703 Pervasive post-transcriptional control of genes involved in amino acid metabolism by the  
704 Hfq-dependent GcvB small RNA. *Mol Microbiol* 81:1144–65.
- 705 36. Abouhamad WN, Manson MD. 1994. The dipeptide permease of *Escherichia coli* closely  
706 resembles other bacterial transport systems and shows growth-phase-dependent  
707 expression. *Mol Microbiol* 14:1077–92.
- 708 37. Beisel CL, Storz G. 2011. The base-pairing RNA spot 42 participates in a multioutput  
709 feedforward loop to help enact catabolite repression in *Escherichia coli*. *Mol Cell* 41:286–  
710 97.
- 711 38. Bologna FP, Andreo CS, Drincovich MF. 2007. *Escherichia coli* malic enzymes: two  
712 isoforms with substantial differences in kinetic properties, metabolic regulation, and  
713 structure. *J Bacteriol* 189:5937–5946.
- 714 39. Scholle A, Vreemann J, Blank V, Nold A, Boos W, Manson MD. 1987. Sequence of the  
715 *mgIB* gene from *Escherichia coli* K12: comparison of wild-type and mutant galactose  
716 chemoreceptors. *Mol Gen Genet* 208:247–53.
- 717 40. Holmqvist E, Wright PR, Li L, Bischler T, Barquist L, Reinhardt R, Backofen R, Vogel J.  
718 2016. Global RNA recognition patterns of post-transcriptional regulators Hfq and CsrA  
719 revealed by UV crosslinking in vivo. *EMBO J* e201593360.
- 720 41. Møller T, Franch T, Udesen C, Gerdes K, Valentin-Hansen P. 2002. Spot 42 RNA mediates  
721 discoordinate expression of the *E. coli* galactose operon. *Genes Dev* 16:1696–706.
- 722 42. Desnoyers G, Massé E. 2012. Noncanonical repression of translation initiation through  
723 small RNA recruitment of the RNA chaperone Hfq. *Genes Dev* 26:726–739.
- 724 43. Urbanowski ML, Stauffer LT, Stauffer G V. 2000. The *gcvB* gene encodes a small  
725 untranslated RNA involved in expression of the dipeptide and oligopeptide transport  
726 systems in *Escherichia coli*. *Mol Microbiol* 37:856–868.
- 727 44. Boy E, Patte J-C. 1972. Multivalent repression of aspartic semialdehyde dehydrogenase in  
728 *Escherichia coli* K-12. *J Bacteriol* 112:84–92.
- 729 45. Seol W, Shatkin AJ. 1991. *Escherichia coli kgtP* encodes an alpha-ketoglutarate  
730 transporter. *Proc Natl Acad Sci* 88:3802–3806.
- 731 46. Wilderman PJ, Sowa NA, FitzGerald DJ, FitzGerald PC, Gottesman S, Ochsner UA, Vasil  
732 ML. 2004. Identification of tandem duplicate regulatory small RNAs in *Pseudomonas*  
733 *aeruginosa* involved in iron homeostasis. *Proc Natl Acad Sci U S A* 101:9792–7.
- 734 47. Oglesby AG, Farrow JM, Lee J-H, Tomaras AP, Greenberg EP, Pesci EC, Vasil ML. 2008. The  
735 influence of iron on *Pseudomonas aeruginosa* physiology: a regulatory link between iron  
736 and quorum sensing. *J Biol Chem* 283:15558–67.
- 737 48. Smaldone GT, Revelles O, Gaballa A, Sauer U, Antelmann H, Helmann JD. 2012. A global  
738 investigation of the *Bacillus subtilis* iron-sparing response identifies major changes in  
739 metabolism. *J Bacteriol* 194:2594–605.
- 740 49. Zhu B, Stülke J. 2017. Subti Wiki in 2018: from genes and proteins to functional network  
741 annotation of the model organism *Bacillus subtilis*. *Nucleic Acids Res* 46:D743–D748.
- 742 50. Lee E, Ito K, Zhao Y, Schadt EE, Irie HY, Zhu J. 2015. Inferred miRNA activity identifies  
743 miRNA-mediated regulatory networks underlying multiple cancers. *Bioinformatics* 32:96–

- 744 105.
- 745 51. Moretto M, Sonogo P, Dierckxsens N, Brilli M, Bianco L, Ledezma-Tejeida D, Gama-Castro  
746 S, Galardini M, Romualdi C, Laukens K, Collado-Vides J, Meysman P, Engelen K. 2016.  
747 COLOMBOS v3.0: leveraging gene expression compendia for cross-species analyses.  
748 Nucleic Acids Res 44:D620-3.
- 749 52. Tchourine K, Vogel C, Bonneau R. 2018. Condition-Specific Modeling of Biophysical  
750 Parameters Advances Inference of Regulatory Networks. Cell Rep 23:376–388.
- 751 53. Wang Y, Cho D-Y, Lee H, Fear J, Oliver B, Przytycka TM. 2018. Reprogramming of  
752 regulatory network using expression uncovers sex-specific gene regulation in *Drosophila*.  
753 Nat Commun 9:4061.
- 754 54. Alvarez MJ, Shen Y, Giorgi FM, Lachmann A, Ding BB, Ye BH, Califano A. 2016. Functional  
755 characterization of somatic mutations in cancer using network-based inference of  
756 protein activity. Nat Genet 48:838.
- 757 55. Osmanbeyoglu HU, Pelosof R, Bromberg JF, Leslie CS. 2014. Linking signaling pathways  
758 to transcriptional programs in breast cancer. Genome Res 24:1869–1880.
- 759 56. Miraldi ER, Pokrovskii M, Waters A, Castro DM, De Veaux N, Hall J, Lee J-Y, Ciofani M,  
760 Madar A, Carriero N, others. 2019. Leveraging chromatin accessibility for transcriptional  
761 regulatory network inference in T Helper 17 Cells. Genome Res gr--238253.
- 762 57. Liao JC, Boscolo R, Yang Y-L, Tran LM, Sabatti C, Roychowdhury VP. 2003. Network  
763 component analysis: reconstruction of regulatory signals in biological systems. Proc Natl  
764 Acad Sci U S A 100:15522–7.
- 765 58. Dehal PS, Joachimiak MP, Price MN, Bates JT, Baumohl JK, Chivian D, Friedland GD,  
766 Huang KH, Keller K, Novichkov PS, Dubchak IL, Alm EJ, Arkin AP. 2010. MicrobesOnline:  
767 an integrated portal for comparative and functional genomics. Nucleic Acids Res  
768 38:D396-400.
- 769 59. Baldi P, Long AD. 2001. A Bayesian framework for the analysis of microarray expression  
770 data: regularized t -test and statistical inferences of gene changes. Bioinformatics  
771 17:509–19.
- 772 60. Huang DW, Sherman BT, Lempicki RA. 2008. Systematic and integrative analysis of large  
773 gene lists using DAVID bioinformatics resources. Nat Protoc 4:44.
- 774 61. Boysen A, Møller-Jensen J, Kallipolitis B, Valentin-Hansen P, Overgaard M. 2010.  
775 Translational regulation of gene expression by an anaerobically induced small non-coding  
776 RNA in *Escherichia coli*. J Biol Chem 285:10690–702.
- 777 62. Durand S, Storz G. 2010. Reprogramming of anaerobic metabolism by the FnrS small  
778 RNA. Mol Microbiol 75:1215–1231.
- 779 63. De Lay N, Gottesman S. 2009. The Crp-activated small noncoding regulatory RNA CyaR  
780 (RyeE) links nutritional status to group behavior. J Bacteriol 191:461–76.
- 781 64. Pulvermacher SC, Stauffer LT, Stauffer G V. 2009. Role of the sRNA GcvB in regulation of  
782 *cycA* in *Escherichia coli*. Microbiology 155:106–114.
- 783 65. Gogol EB, Rhodius VA, Papenfort K, Vogel J, Gross CA. 2011. Small RNAs endow a  
784 transcriptional activator with essential repressor functions for single-tier control of a  
785 global stress regulon. Proc Natl Acad Sci U S A 108:12875–80.
- 786 66. Guillier M, Gottesman S. 2006. Remodelling of the *Escherichia coli* outer membrane by  
787 two small regulatory RNAs. Mol Microbiol 59:231–247.

- 788 67. Guillier M, Gottesman S. 2008. The 5' end of two redundant sRNAs is involved in the  
789 regulation of multiple targets, including their own regulator. *Nucleic Acids Res* 36:6781–  
790 6794.
- 791 68. Borirak O, Rolfe MD, de Koning LJ, Hoefsloot HCJ, Bekker M, Dekker HL, Roseboom W,  
792 Green J, de Koster CG, Hellingwerf KJ. 2015. Time-series analysis of the transcriptome  
793 and proteome of *Escherichia coli* upon glucose repression. *Biochim Biophys Acta (BBA)-*  
794 *Proteins Proteomics* 1854:1269–1279.
- 795 69. Sittka A, Lucchini S, Papenfort K, Sharma CM, Rolle K, Binnewies TT, Hinton JCD, Vogel J.  
796 2008. Deep sequencing analysis of small noncoding RNA and mRNA targets of the global  
797 post-transcriptional regulator, Hfq. *PLoS Genet* 4:e1000163.
- 798 70. Galán-Vásquez E, Luna B, Martínez-Antonio A. 2011. The Regulatory Network of  
799 *Pseudomonas aeruginosa*. *Microb Inform Exp* 1:3.
- 800 71. Schulz S, Eckweiler D, Bielecka A, Nicolai T, Franke R, Dötsch A, Hornischer K, Bruchmann  
801 S, Düvel J, Häussler S. 2015. Elucidation of sigma factor-associated networks in  
802 *Pseudomonas aeruginosa* reveals a modular architecture with limited and function-  
803 specific crosstalk. *PLoS Pathog* 11:e1004744.
- 804 72. Michna RH, Commichau FM, Tödter D, Zschiedrich CP, Stülke J. 2014. SubtiWiki-a  
805 database for the model organism *Bacillus subtilis* that links pathway, interaction and  
806 expression information. *Nucleic Acids Res* 42:D692-8.
- 807 73. Nicolas P, Durand S, Gilet L, Bessie P. 2012. Three Essential Ribonucleases — RNase Y , J1  
808 , and III — Control the Abundance of a Majority of *Bacillus subtilis* mRNAs 8.  
809

810 FIGURES

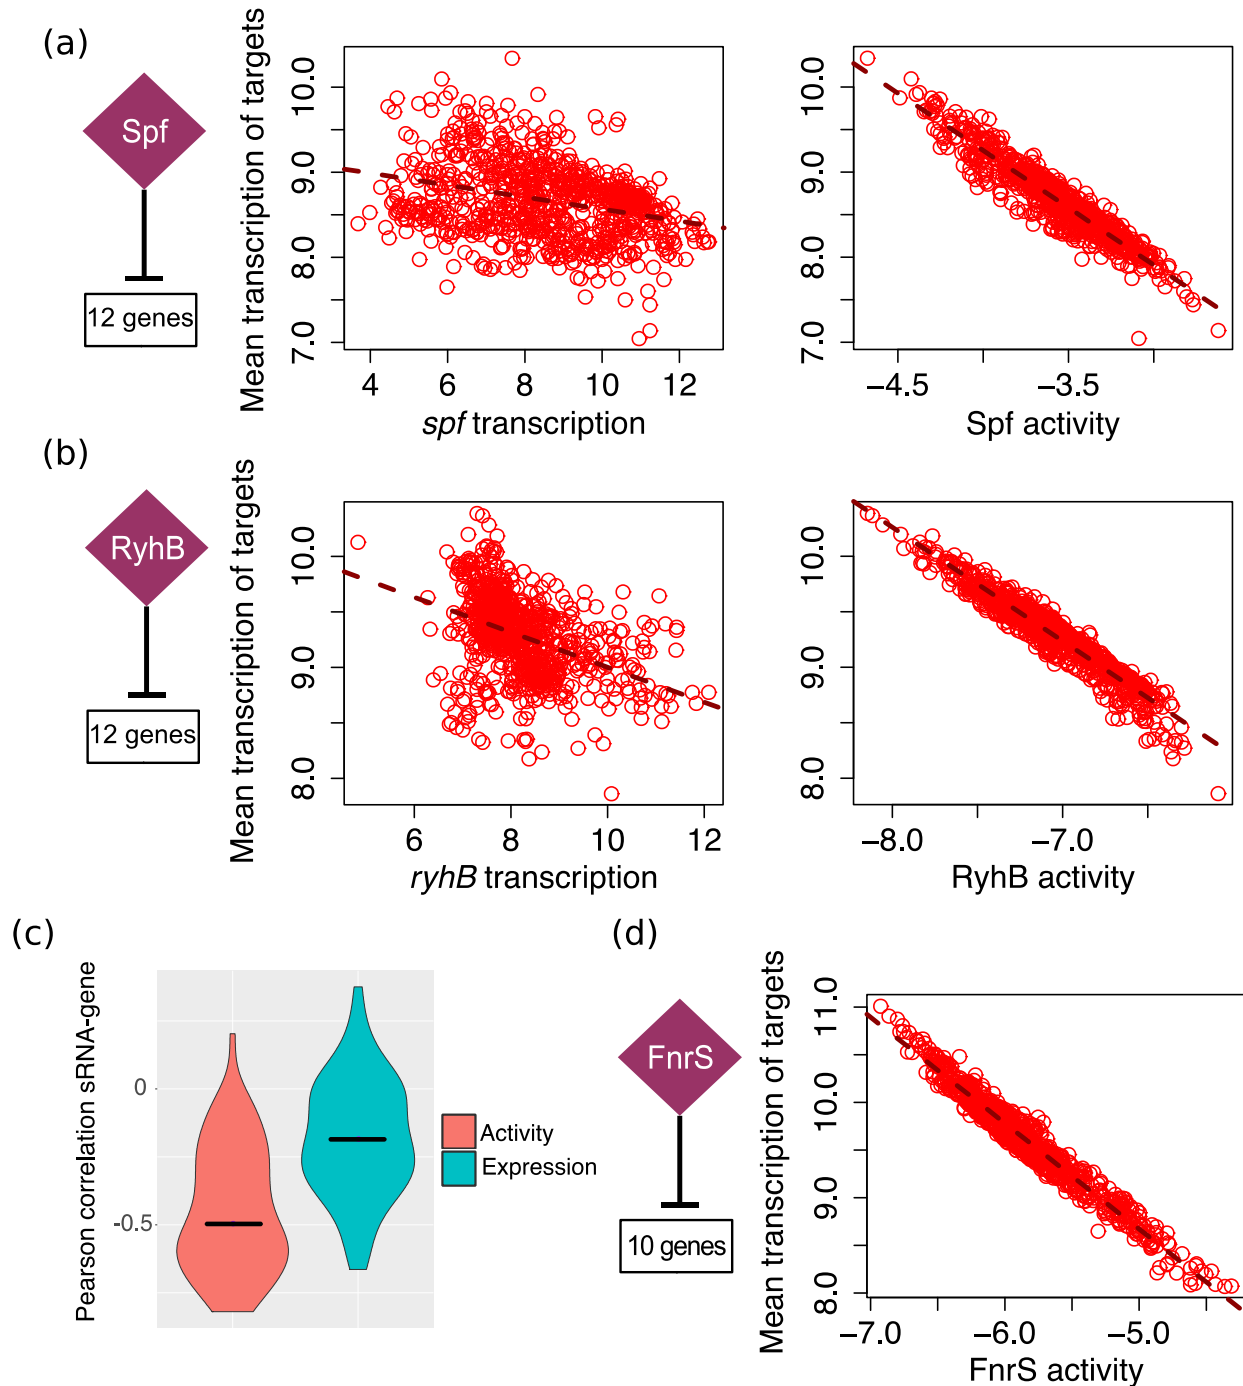

811  
812 **Figure 1. The transcriptional profile of a sRNA is a sub-optimal proxy for its regulatory activity.**  
813 The motivation for estimating sRNA activities is illustrated for three *E. coli* sRNAs. sRNA activities  
814 were estimated for each experimental condition. Each dot represents one microarray  
815 experiment. The number of known targets used to estimate sRNA activities and to compute the  
816 mean transcription of the analyzed regulons (in each condition) is indicated. A) Spf controls the  
817 uptake and metabolism of alternative sugars (37). A stronger relation is observed between the  
818 estimated Spf activity and the mean transcription profile of its dependent genes (right panel)

819 than between the transcription profile of *spf* and its targets (left panel). B) RyhB is involved in  
820 iron metabolism and represses expression of iron-consuming genes as part of the iron sparing  
821 response under iron poor conditions (31). Similarly, the relation between estimated RyhB activity  
822 and the mean transcription profile of its targets is stronger than the relation between the  
823 transcription profile of *ryhB* and its targets. C) Violin plots show the distribution of Pearson  
824 correlation values between sRNAs and the transcriptional profile of their priors when either  
825 estimated sRNA activities or sRNA transcriptional profiles are used for computation. Black lines  
826 indicate median correlation values (-0.5 and -0.18 for sRNA activity and sRNA transcriptional  
827 profiles, respectively). The difference between both sets of correlation values is statistically  
828 significant (T-test p-value =  $9.3 \times 10^{-10}$ ). D) FnrS is involved in respiration (61, 62). Probes for the  
829 *fnrS* gene did not need to be present in the *E. coli* transcriptomic dataset in order to be included  
830 as potential regulator in our pipeline. FnrS activities were estimated from the transcriptional  
831 profile of 10 FnrS-dependent genes present in the dataset.  
832

833

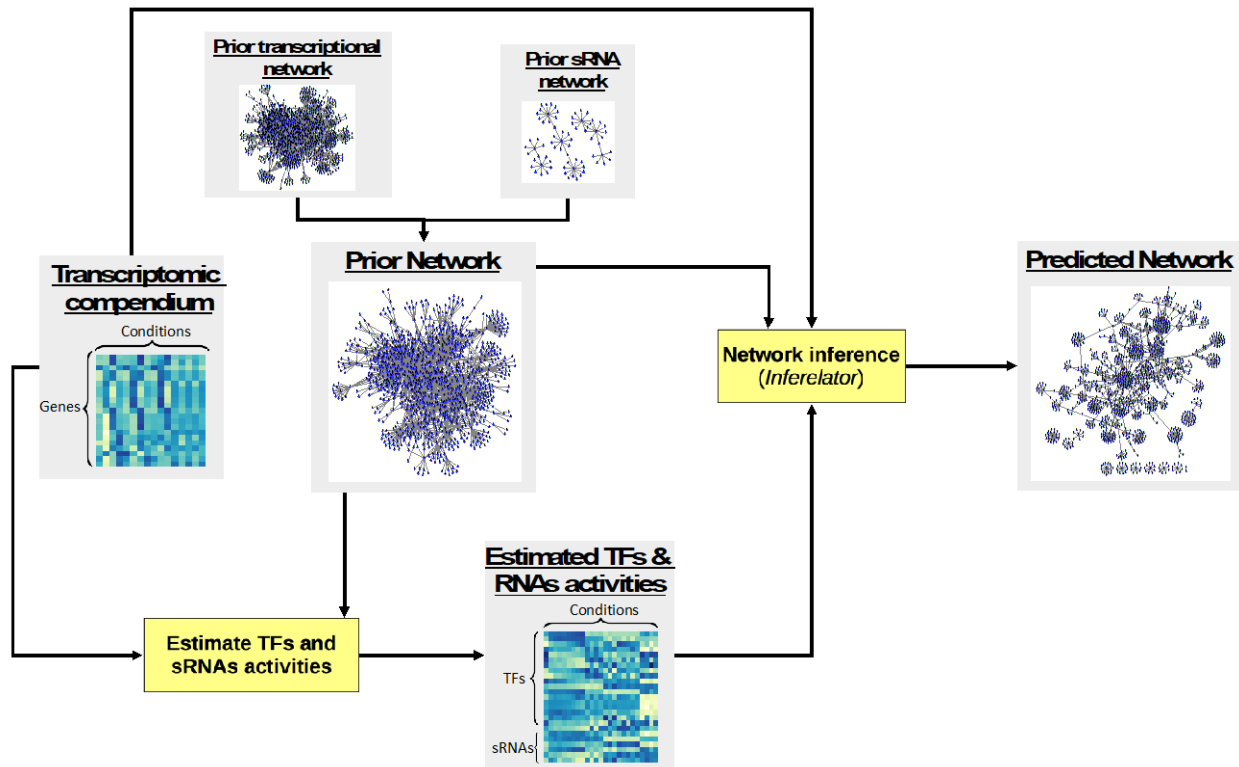

834

835 **Figure 2. General strategy.**

836 A transcriptomic dataset and a prior network (built from experimentally supported TF-gene and  
837 supported or candidate sRNA-mRNA interactions) are used for estimating the regulatory  
838 activities of TFs (TFAs) and sRNAs (SRAs) using a network component analysis approach (27, 57).  
839 Next, estimated TFAs and SRAs, transcriptomic data and prior network are used as input for the  
840 *Inferelator* to infer a regulatory network composed of a transcriptional layer (TF-based) and a  
841 post-transcriptional layer (sRNA-based).

842

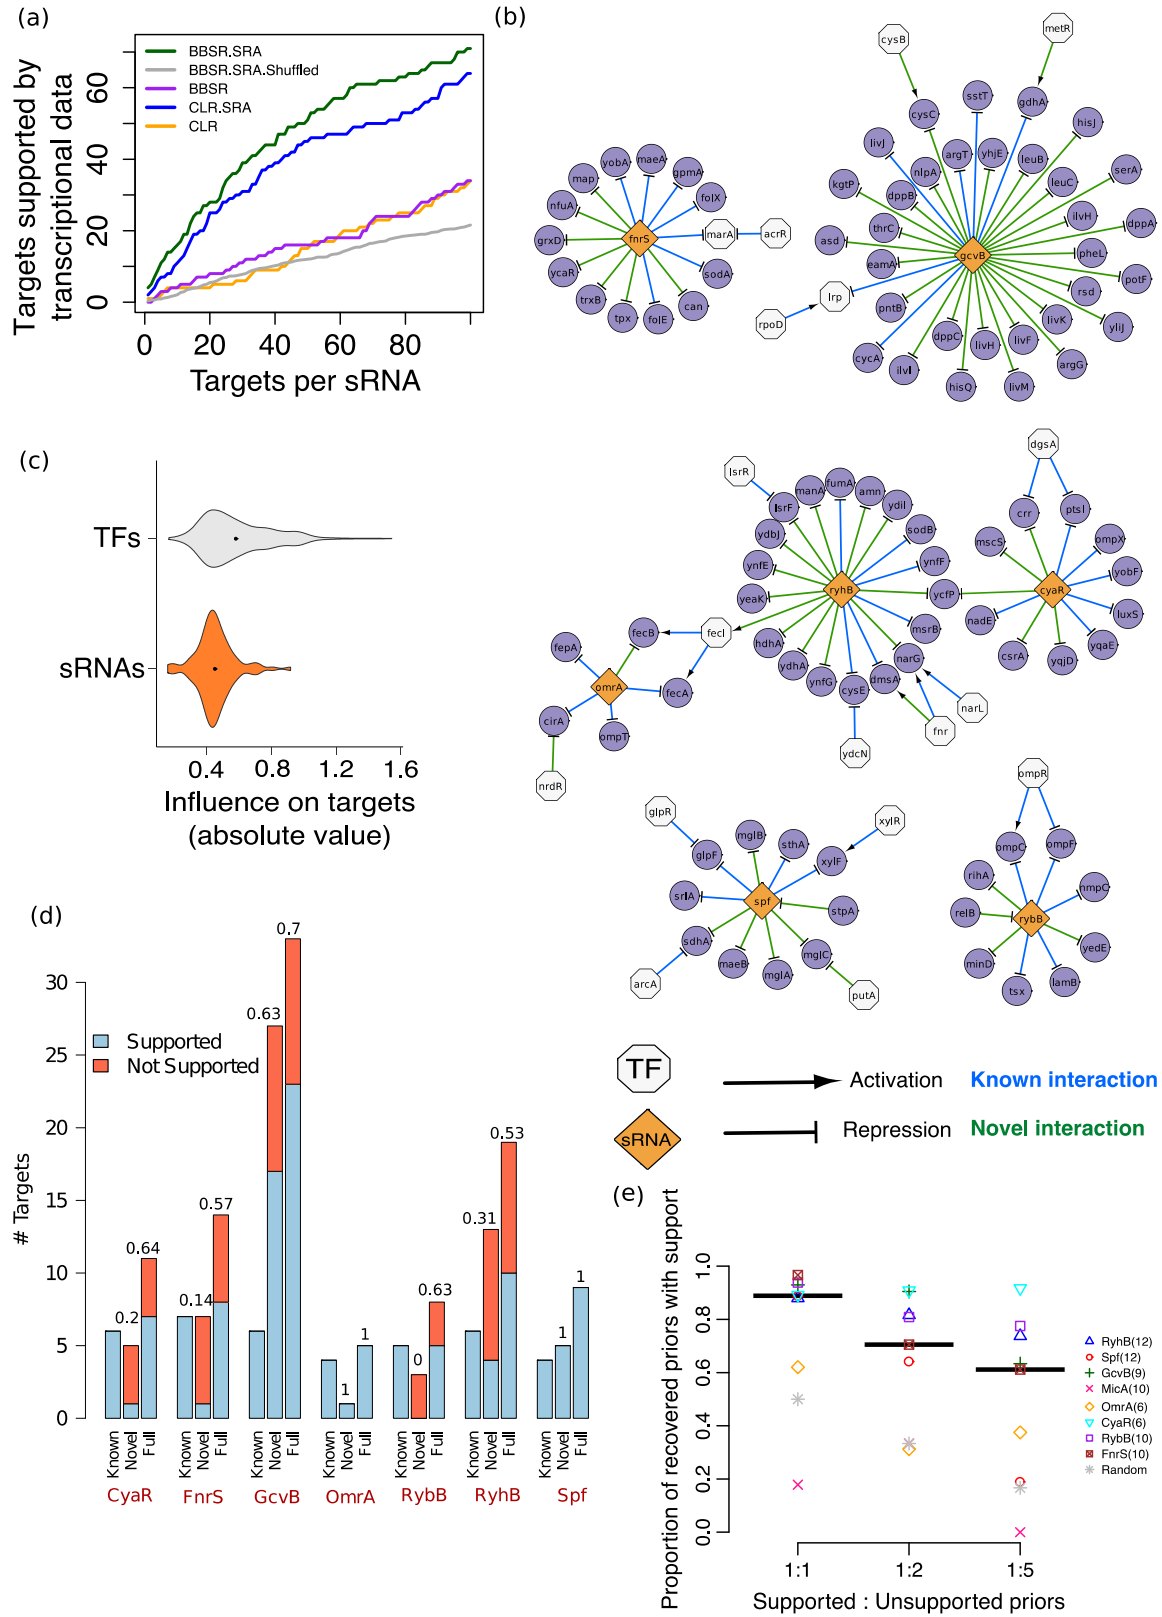

843  
844  
845

**Figure 3. Performance of the Inferelator and alternative computational methods for expanding sRNA networks.**



846 A) Performance of the Inferelator (BBSR) and mixed-CLR, an alternative method, with (indicated  
847 by the SRA suffix) and without incorporation of sRNA activities. Genes predicted as targets but  
848 not used for sRNA activity estimation were considered to be experimentally supported if they  
849 were differentially expressed in transcriptional profiling experiments (deletion or over-  
850 expression of CyaR, GcvB, MicA, OmrA, Spf, RybB and RyhB) or when they were part of an operon  
851 containing differentially expressed genes. For each sRNA, targets were ranked based on  
852 confidence score (in the case of the Inferelator) or mutual information-based score (in the mixed-  
853 CLR runs). To estimate the basal performance level of the Inferelator, the average of ten runs  
854 with shuffled sRNA priors was also computed (grey line). B) The inferred sRNA regulatory network  
855 of *E. coli*. To allow comparison between transcriptional and post-transcriptional networks,  
856 overlap between both networks is displayed. C) Violin plots showing distribution of absolute  
857 values of Bayesian regression coefficients (which indicate magnitude and direction) associated  
858 with TF-gene and sRNA-mRNA interactions. Black dots indicate the median. D) The inferred sRNA  
859 regulons are experimentally supported. Experimental support rate for novel predictions (not in  
860 the prior network) and full inferred regulons (recovered priors and novel predictions) of the  
861 Inferelator.SRA run described in panel A are shown on top of each bar. E) The Inferelator can  
862 identify experimentally supported targets among noisy priors. Experimental support rates for  
863 recovered priors are plotted for different levels of noise in the priors. Each dot is the mean value  
864 of ten Inferelator runs (each run with a different set of false priors). Each colored symbol  
865 corresponds to one of eight sRNAs. Black lines indicate the median proportion for all eight sRNAs.  
866 Gray star indicates the expected proportion if priors included in the predicted networks were  
867 randomly selected. Number of true sRNA targets is shown in parentheses.  
868



886 black text. Novel targets (i.e. not present in the priors) are labeled with white text. Targets genes  
887 are colored based on their functional annotation.  
888

889

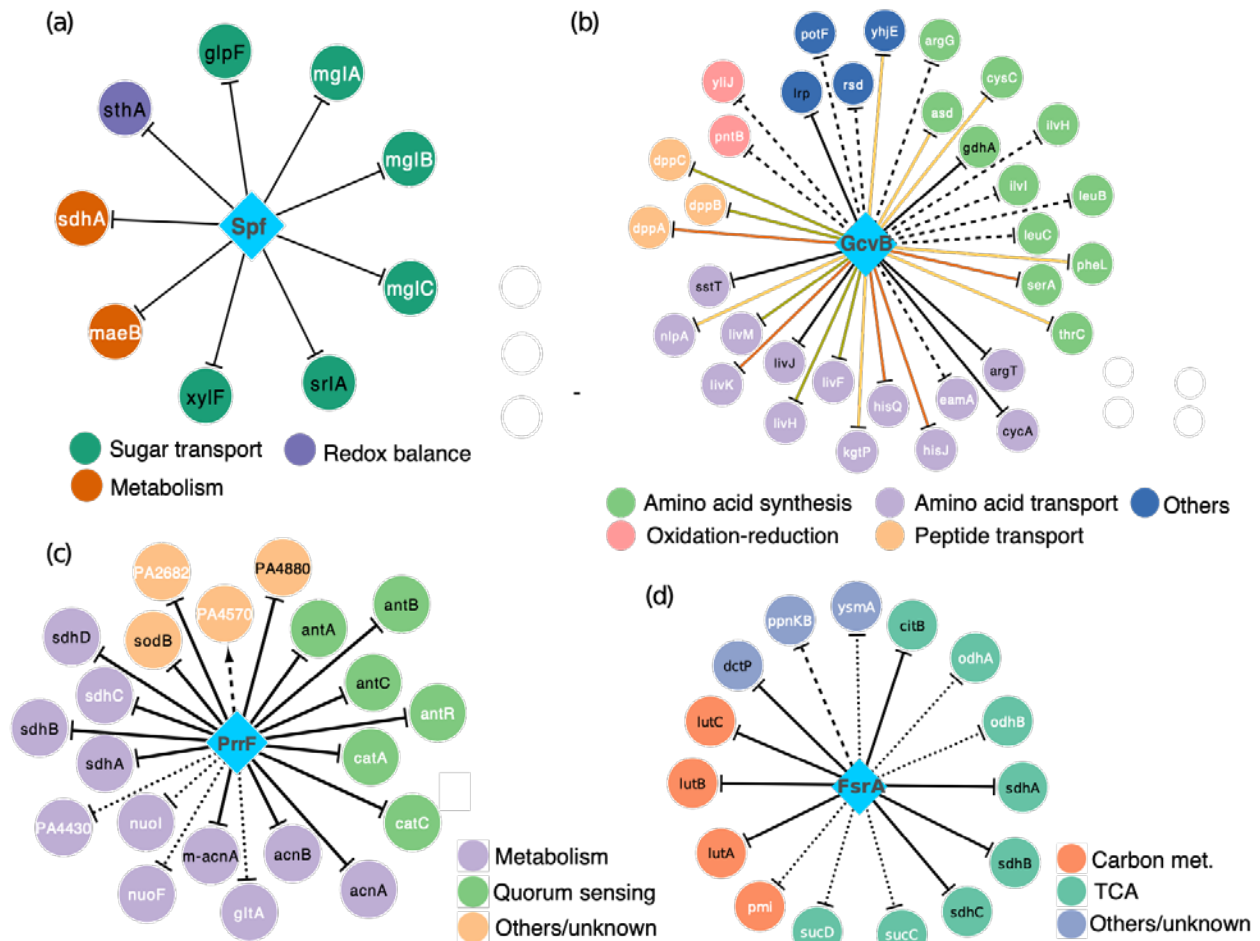

890

891

**Figure 5. Selected expanded sRNA regulons of *E. coli*, *P. aeruginosa* and *B. subtilis*.**

892

White node labels indicate novel targets (not present in the sRNA priors) and black node labels indicate prior targets. Solid lines indicate priors and experimentally supported novel targets. Dotted lines indicate interactions partially supported by experimental data, computational RNA-RNA prediction methods or data from functional analogs in other species. Dashed lines indicate unsupported predictions. A) The inferred *E. coli* Spt regulon. All predicted targets are experimentally supported. B) The inferred *E. coli* GcvB regulon. Novel interactions supported by transcriptional profiling data, physical binding data or both are shown in green, orange and red, respectively. C) The inferred PrrF regulon of *P. aeruginosa*. D) The inferred FsrA regulon of *B. subtilis*. In each panel, nodes are color-coded by functional categories.

893

894

895

896

897

898

899

900

901

902

903

904

905 TABLES  
906

907 Table 1. *Escherichia coli* sRNAs analyzed in this study

| sRNA                   | Biological process                | Prior Targets                                                                 | Differentially expressed genes <sup>§</sup> | References |
|------------------------|-----------------------------------|-------------------------------------------------------------------------------|---------------------------------------------|------------|
| CyaR                   | Sugar metabolism                  | <i>luxS, nadE, ompX, yqaE, yobF, ptsI</i>                                     | 28                                          | (63)       |
| FnrS                   | Anaerobic respiration             | <i>cydD, folE, folX, gpmA, maeA, marA, metE, sodA, sodB, yobA</i>             | 59                                          | (61, 62)   |
| GcvB                   | Amino acid metabolism & transport | <i>argT, csgD, cycA, gdhA, livJ, lrp, phoP, sstT, yifK</i>                    | 88                                          | (64)       |
| MicA                   | Stress response                   | <i>ecnB, fimB, lamB, lpxT, ompA, ompW, tsx, ycfS, yfeK</i>                    | 16                                          | (65)       |
| OmrA/OmrB <sup>^</sup> | Stress response (membrane)        | <i>cirA, csgD, fecA, fepA, oprM, oprT</i>                                     | 48                                          | (66, 67)   |
| RybB                   | Stress response                   | <i>fadL, fiu, lamB, nmpC, ompA, ompC, ompF, ompW, rluD, tsx</i>               | 22                                          | (65)       |
| RyhB                   | Iron metabolism                   | <i>acnA, cysE, dmsA, erpA, fumA, fumB, msrB, nagZ, sodB, uof, ykgJ, ynfF</i>  | 87*                                         | (24, 31)   |
| Spf                    | Sugar metabolism & transport      | <i>ascF, fucl, galk, glpF, gltA, maeA, nanC, paaK, puuE, srlA, sthA, xylF</i> | 42 <sup>#</sup>                             | (37)       |

<sup>§</sup>Based on available profiling data

\*Includes ribosome profiling data

<sup>#</sup>Re-analyzed using Cyber-T (59)

<sup>^</sup>OmrA and OmrB were merged in a single regulator (OmrA)

908  
909

910

911

912

913

914

915

916 **Table 2. Putative new members of the RyhB, GcvB and Spf regulons identified using CopraRNA-**  
 917 **derived sRNA priors.**  
 918

| sRNA | Target             | Experimental support | Recovered prior | Prior set%         | References |
|------|--------------------|----------------------|-----------------|--------------------|------------|
| RyhB | <i>cheY</i>        | B, S                 | YES             | (i)                | (10, 33)   |
| RyhB | <i>tpx</i>         | B                    | NO              | (i)                | (10)       |
| RyhB | <i>folX</i>        | B                    | NO              | (ii)               | (10)       |
| RyhB | <i>gshB</i>        | B                    | NO              | (ii)               | (10)       |
| RyhB | <i>ubiD</i>        | B                    | NO              | (ii),(vi)          | (10)       |
| RyhB | <i>ybaB</i>        | B                    | NO              | (ii),(iv),(vi)     | (10)       |
| RyhB | <i>fabZ</i>        | B                    | NO              | (vi)               | (10)       |
| RyhB | <i>mrp</i>         | B, RP                | NO              | (iv)               | (10, 31)   |
| GcvB | <i>dcyD (yedO)</i> | B, S                 | NO              | (i),(ii),(v), (vi) | (10, 35)   |
| GcvB | <i>icd</i>         | B                    | NO              | (i)                | (10)       |
| GcvB | <i>purU</i>        | B, S                 | NO              | (i)                | (10, 35)   |
| GcvB | <i>aroP</i>        | B, S                 | YES             | (ii)-(vi)          | (10, 35)   |
| GcvB | <i>gdhA</i>        | B, S                 | YES             | (ii),(iii),(vi)    | (10, 35)   |
| GcvB | <i>ydiJ</i>        | B                    | YES             | (ii),(v)           | (10)       |
| GcvB | <i>hcxB</i>        | B                    | NO              | (ii)-(vi)          | (10)       |
| GcvB | <i>asd</i>         | B                    | NO              | (ii)-(vi)          | (10)       |
| Spf  | <i>lysS</i>        | B, I                 | YES             | (i)                | (10, 68)   |
| Spf  | <i>tktA</i>        | B, I                 | YES             | (i)                | (10, 69)   |
| Spf  | <i>fabA</i>        | TP                   | NO              | (i)                | -          |
| Spf  | <i>yjjK</i>        | TP,I                 | NO              | (i),(ii),(v), (vi) | (10, 68)   |
| Spf  | <i>mglB</i>        | TP, S                | YES             | (iii)-(iv)         | (40)       |
| Spf  | <i>rbsB</i>        | TP                   | NO              | (iii)              | -          |
| Spf  | <i>fadL</i>        | TP                   | YES             | (iv)               | -          |
| Spf  | <i>lpd</i>         | B                    | YES             | (iv),(vi)          | (10)       |
| Spf  | <i>mdh</i>         | B                    | NO              | (iv),(vi)          | (10)       |
| Spf  | <i>yjiA</i>        | B, TP                | YES             | (v)                | (10)       |

919 B: Physical interaction between sRNA and candidate target

920 S: Experimental support from studies in *Salmonella*

921 RP: Ribosome profiling

922 I: Indirect supporting evidence (e.g. differential expression in Hfq gene deletion strain)

923 TP: Our differential expression analysis of transcriptional profiling data reported in (37)

924 %Refers to the six versions of CopraRNA-derived sRNA priors described in the main text

925

926

927 SUPPLEMENTARY FIGURES  
928

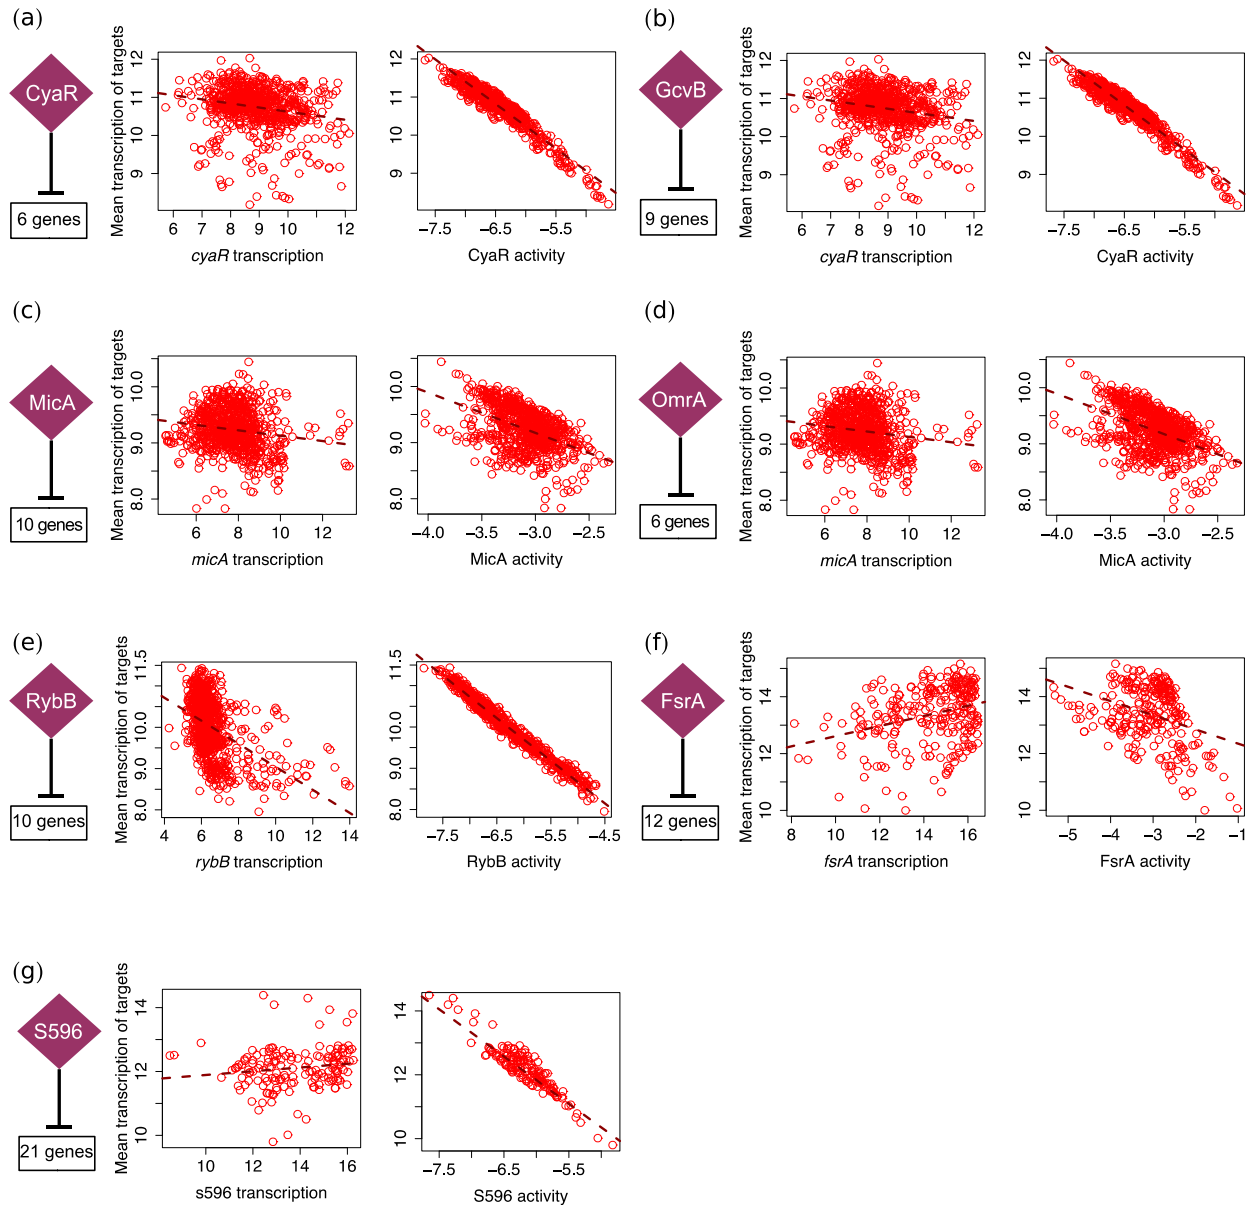

929  
930

931 **Figure S1. Motivation for estimating the regulatory activity of sRNAs in Gram-positive and**  
932 **Gram-negative bacteria.**

933 sRNA activities were estimated for each experimental condition. Each dot represents one  
934 microarray experiment. The number of experimentally supported targets used to estimate sRNA  
935 activities and to compute the mean transcription of the analyzed regulons (in each condition) is  
936 indicated. In all cases, a stronger relation is observed between the estimated sRNA activities and  
937 the average transcription profile of their dependent genes (right panels) than between the  
938 transcription profile of the sRNAs and the average transcription profile of their targets (left  
939 panels). A) *E. coli* CyaR controls genes involved in sugar metabolism (63). CyaR is expressed  
940 during high cellular levels of cAMP. B) *E. coli* GcvB regulates genes involved in amino acid

941 transport and amino acid biosynthesis (64). C) *E. coli* MicA is a stress related sRNA (65). D) *E. coli*  
942 OmrA is important in the response to membrane stress (66, 67). E) *E. coli* RybB is a stress related  
943 sRNA (65). MicA and RybB have multiple targets in common. F) FsrA is involved in the iron sparing  
944 response of *B. subtilis* (25). FsrA is a functional analog of RyhB in *E. coli*. G) S596 was recently  
945 identified as the functional analog of RyhB and FsrA in *S. aureus* (26).  
946



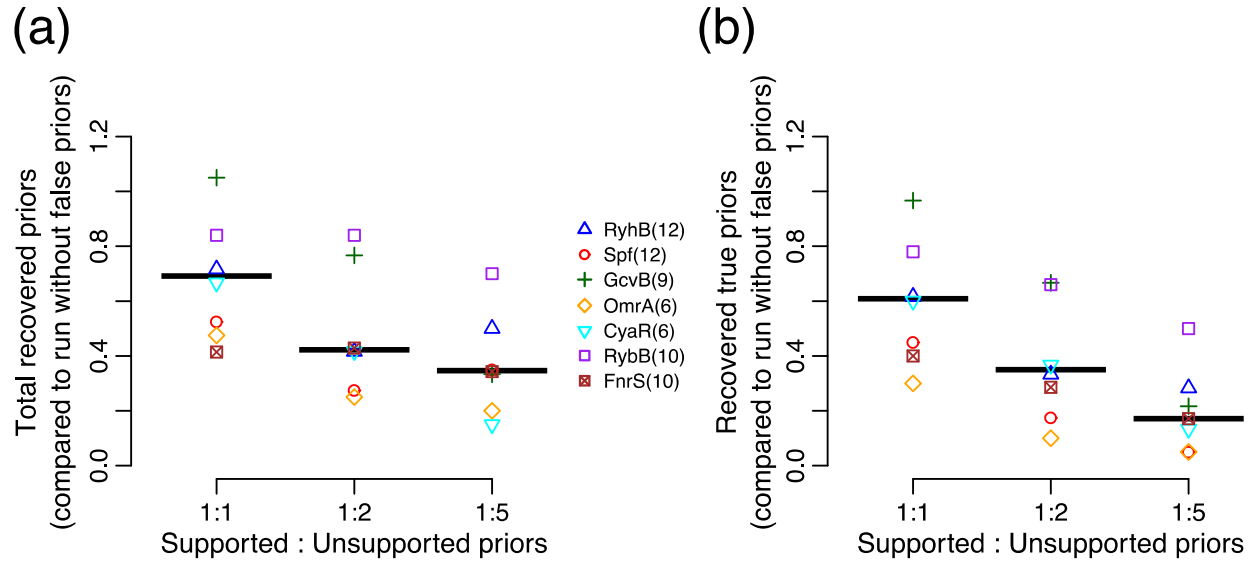

947

948

949

**Figure S2. Presence of false sRNA-mRNA interactions reduced the number of sRNA priors included in the networks inferred by the Inferelator.**

950

Each dot is the mean value of ten Inferelator runs (each one with a different set of false priors). Each colored symbol corresponds to one of seven sRNAs. Black lines indicate the median proportion for all seven sRNAs. Number of true targets for each sRNA is shown in parentheses.

951

A) Ratio between the number recovered priors in Inferelator runs with noisy sRNA priors and the total number of recovered priors in the Inferelator run without false positives. B) Ratio between number of recovered priors with experimental support (true priors) in Inferelator runs with noisy sRNA priors and the total number of recovered priors in the Inferelator run without false positives.

952

953

954

955

956

957

958

959

960 **SUPPLEMENTARY TABLES**

961

962 **Table S1. sRNA-mRNA interactions used as priors in this study.**

963

| <b>Species</b> | <b>sRNA</b> | <b>Target gene</b> | <b>Locus</b> |
|----------------|-------------|--------------------|--------------|
| <i>E. coli</i> | CyaR        | ompX               | b0814        |
| <i>E. coli</i> | CyaR        | nadE               | b1740        |
| <i>E. coli</i> | CyaR        | yobF               | b1824        |
| <i>E. coli</i> | CyaR        | ptsI               | b2416        |
| <i>E. coli</i> | CyaR        | yqaE               | b2666        |
| <i>E. coli</i> | CyaR        | luxS               | b2687        |
| <i>E. coli</i> | FnrS        | gpmA               | b0755        |
| <i>E. coli</i> | FnrS        | cydD               | b0887        |
| <i>E. coli</i> | FnrS        | maeA               | b1479        |
| <i>E. coli</i> | FnrS        | marA               | b1531        |
| <i>E. coli</i> | FnrS        | sodB               | b1656        |
| <i>E. coli</i> | FnrS        | yobA               | b1841        |
| <i>E. coli</i> | FnrS        | folE               | b2153        |
| <i>E. coli</i> | FnrS        | folX               | b2303        |
| <i>E. coli</i> | FnrS        | metE               | b3829        |
| <i>E. coli</i> | FnrS        | sodA               | b3908        |
| <i>E. coli</i> | GcvB        | lrp                | b0889        |
| <i>E. coli</i> | GcvB        | csgD               | b1040        |
| <i>E. coli</i> | GcvB        | phoP               | b1130        |
| <i>E. coli</i> | GcvB        | gdhA               | b1761        |
| <i>E. coli</i> | GcvB        | argT               | b2310        |
| <i>E. coli</i> | GcvB        | sstT               | b3089        |
| <i>E. coli</i> | GcvB        | livJ               | b3460        |
| <i>E. coli</i> | GcvB        | yifK               | b3795        |
| <i>E. coli</i> | GcvB        | cycA               | b4208        |
| <i>E. coli</i> | MicA        | tsx                | b0411        |
| <i>E. coli</i> | MicA        | ompX               | b0814        |
| <i>E. coli</i> | MicA        | ompA               | b0957        |
| <i>E. coli</i> | MicA        | ycfS               | b1113        |
| <i>E. coli</i> | MicA        | ompW               | b1256        |
| <i>E. coli</i> | MicA        | lpxT               | b2174        |
| <i>E. coli</i> | MicA        | yfeK               | b2419        |
| <i>E. coli</i> | MicA        | lamB               | b4036        |
| <i>E. coli</i> | MicA        | fimB               | b4312        |

|                |      |      |       |
|----------------|------|------|-------|
| <i>E. coli</i> | MicA | ecnB | b4411 |
| <i>E. coli</i> | OmrA | ompT | b0565 |
| <i>E. coli</i> | OmrA | fepA | b0584 |
| <i>E. coli</i> | OmrA | csgD | b1040 |
| <i>E. coli</i> | OmrA | cirA | b2155 |
| <i>E. coli</i> | OmrA | ompR | b3405 |
| <i>E. coli</i> | OmrA | fecA | b4291 |
| <i>E. coli</i> | RybB | tsx  | b0411 |
| <i>E. coli</i> | RybB | nmpC | b0553 |
| <i>E. coli</i> | RybB | fiu  | b0805 |
| <i>E. coli</i> | RybB | ompF | b0929 |
| <i>E. coli</i> | RybB | ompA | b0957 |
| <i>E. coli</i> | RybB | ompW | b1256 |
| <i>E. coli</i> | RybB | ompC | b2215 |
| <i>E. coli</i> | RybB | fadL | b2344 |
| <i>E. coli</i> | RybB | rluD | b2594 |
| <i>E. coli</i> | RybB | lamB | b4036 |
| <i>E. coli</i> | RyhB | erpA | b0156 |
| <i>E. coli</i> | RyhB | ykgJ | b0288 |
| <i>E. coli</i> | RyhB | dmsA | b0894 |
| <i>E. coli</i> | RyhB | nagZ | b1107 |
| <i>E. coli</i> | RyhB | acnA | b1276 |
| <i>E. coli</i> | RyhB | ynfF | b1588 |
| <i>E. coli</i> | RyhB | fumA | b1612 |
| <i>E. coli</i> | RyhB | sodB | b1656 |
| <i>E. coli</i> | RyhB | msrB | b1778 |
| <i>E. coli</i> | RyhB | cysE | b3607 |
| <i>E. coli</i> | RyhB | fumB | b4122 |
| <i>E. coli</i> | RyhB | uof  | b4637 |
| <i>E. coli</i> | Spf  | gltA | b0720 |
| <i>E. coli</i> | Spf  | galK | b0757 |
| <i>E. coli</i> | Spf  | puuE | b1302 |
| <i>E. coli</i> | Spf  | paaK | b1398 |
| <i>E. coli</i> | Spf  | maeA | b1479 |
| <i>E. coli</i> | Spf  | srlA | b2702 |
| <i>E. coli</i> | Spf  | ascF | b2715 |
| <i>E. coli</i> | Spf  | fucl | b2802 |
| <i>E. coli</i> | Spf  | xylF | b3566 |

|                      |      |        |               |
|----------------------|------|--------|---------------|
| <i>E. coli</i>       | Spf  | glpF   | b3927         |
| <i>E. coli</i>       | Spf  | sthA   | b3962         |
| <i>E. coli</i>       | Spf  | nanC   | b4311         |
| <i>P. aeruginosa</i> | PrrF | m-acnA | PA0794        |
| <i>P. aeruginosa</i> | PrrF | acnA   | PA1562        |
| <i>P. aeruginosa</i> | PrrF | sdhD   | PA1582        |
| <i>P. aeruginosa</i> | PrrF | sdhA   | PA1583        |
| <i>P. aeruginosa</i> | PrrF | sdhB   | PA1584        |
| <i>P. aeruginosa</i> | PrrF | acnB   | PA1787        |
| <i>P. aeruginosa</i> | PrrF | antA   | PA2512        |
| <i>P. aeruginosa</i> | PrrF | antB   | PA2513        |
| <i>P. aeruginosa</i> | PrrF | antC   | PA2514        |
| <i>P. aeruginosa</i> | PrrF | sodB   | PA4366        |
| <i>P. aeruginosa</i> | PrrF | HUU    | PA4880        |
| <i>B. subtilis</i>   | FsrA | dctP   | BSU04470      |
| <i>B. subtilis</i>   | FsrA | citB   | BSU18000      |
| <i>B. subtilis</i>   | FsrA | gltA   | BSU18440      |
| <i>B. subtilis</i>   | FsrA | gltB   | BSU18450      |
| <i>B. subtilis</i>   | FsrA | leuC   | BSU28250      |
| <i>B. subtilis</i>   | FsrA | leuD   | BSU28260      |
| <i>B. subtilis</i>   | FsrA | sdhA   | BSU28430      |
| <i>B. subtilis</i>   | FsrA | sdhB   | BSU28440      |
| <i>B. subtilis</i>   | FsrA | sdhC   | BSU28450      |
| <i>B. subtilis</i>   | FsrA | lutA   | BSU34030      |
| <i>B. subtilis</i>   | FsrA | lutB   | BSU34040      |
| <i>B. subtilis</i>   | FsrA | lutC   | BSU34050      |
| <i>S. aureus</i>     | S596 | addB   | SAOUHSC_00904 |
| <i>S. aureus</i>     | S596 | -      | SAOUHSC_00907 |
| <i>S. aureus</i>     | S596 | ctaA   | SAOUHSC_01065 |
| <i>S. aureus</i>     | S596 | sdhC   | SAOUHSC_01103 |
| <i>S. aureus</i>     | S596 | miaB   | SAOUHSC_01269 |
| <i>S. aureus</i>     | S596 | katA   | SAOUHSC_01327 |
| <i>S. aureus</i>     | S596 | citB   | SAOUHSC_01347 |
| <i>S. aureus</i>     | S596 | arIR   | SAOUHSC_01420 |
| <i>S. aureus</i>     | S596 | gpsA   | SAOUHSC_01491 |
| <i>S. aureus</i>     | S596 | citZ   | SAOUHSC_01802 |
| <i>S. aureus</i>     | S596 | -      | SAOUHSC_01882 |
| <i>S. aureus</i>     | S596 | hemE   | SAOUHSC_01962 |

|                  |      |      |               |
|------------------|------|------|---------------|
| <i>S. aureus</i> | S596 | rumA | SAOUHSC_02113 |
| <i>S. aureus</i> | S596 | ilvD | SAOUHSC_02281 |
| <i>S. aureus</i> | S596 | -    | SAOUHSC_02303 |
| <i>S. aureus</i> | S596 | fdhA | SAOUHSC_02582 |
| <i>S. aureus</i> | S596 | -    | SAOUHSC_02651 |
| <i>S. aureus</i> | S596 | nreC | SAOUHSC_02675 |
| <i>S. aureus</i> | S596 | -    | SAOUHSC_02760 |
| <i>S. aureus</i> | S596 | -    | SAOUHSC_02779 |
| <i>S. aureus</i> | S596 | citM | SAOUHSC_02943 |

---

964

965 **Table S2. The Inferelator filters the CopraRNA-derived priors and predicts novel sRNA-mRNA**  
 966 **interactions with experimental support.**

967

| sRNA Prior selection <sup>&amp;</sup>                       | sRNA | Priors | Supported priors <sup>#</sup> | Priors predicted as targets <sup>#</sup> | New targets <sup>#</sup> |
|-------------------------------------------------------------|------|--------|-------------------------------|------------------------------------------|--------------------------|
| Top 100 (i)                                                 | RyhB | 100    | 29 (0.29)                     | 5 (1)                                    | 6 (0.17)                 |
|                                                             | GcvB | 100    | 30 (0.3)                      | 3 (0.67)                                 | 12 (0.42)                |
|                                                             | Spf  | 100    | 17 (0.17)                     | 6 (0.33)                                 | 27 (0.07)                |
| P-values $\leq$ 0.01 (ii)                                   | RyhB | 49     | 17 (0.35)                     | 5 (0.4)                                  | 29 (0.14)                |
|                                                             | GcvB | 46     | 21 (0.46)                     | 11 (0.82)                                | 39 (0.41)                |
|                                                             | Spf  | 54     | 12 (0.22)                     | 4 (0.25)                                 | 17 (0.06)                |
| Annotated with enriched terms (iii)                         | RyhB | 38     | 19 (0.5)                      | 6 (1)                                    | 9 (0.44)                 |
|                                                             | GcvB | 34     | 19 (0.56)                     | 11 (0.82)                                | 43 (0.37)                |
|                                                             | Spf  | 43     | 11 (0.26)                     | 5 (0.4)                                  | 6 (0.17)                 |
| P-values $\leq$ 0.01 AND annotated with enriched terms (iv) | RyhB | 20     | 11 (0.55)                     | 1 (1)                                    | 6 (0.33)                 |
|                                                             | GcvB | 22     | 16 (0.73)                     | 13 (0.77)                                | 37 (0.46)                |
|                                                             | Spf  | 23     | 8 (0.35)                      | 6 (0.67)                                 | 12 (0.17)                |
| P-values $\leq$ 0.01 OR annotated with enriched terms (v)   | RyhB | 67     | 25 (0.37)                     | 4 (1)                                    | 1 (0)                    |
|                                                             | GcvB | 58     | 24 (0.41)                     | 10 (0.8)                                 | 39 (0.36)                |
|                                                             | Spf  | 74     | 15 (0.2)                      | 7 (0.29)                                 | 17 (0.06)                |
| Top 15+ <sup>§</sup> (vi)                                   | RyhB | 29     | 14 (0.48)                     | 1 (1)                                    | 8 (0.38)                 |
|                                                             | GcvB | 25     | 16 (0.64)                     | 10 (0.8)                                 | 36 (0.5)                 |
|                                                             | Spf  | 32     | 10 (0.31)                     | 4 (0.5)                                  | 14 (0.14)                |

968 Predicted targets with physical interaction with sRNAs according to binding data in (10), or  
 969 differential expression in transcriptional profiling experiments (overexpressing or deleting  
 970 putative sRNA regulator) were considered supported. Members of operons with differential  
 971 expression in sRNA perturbation were also considered experimentally supported.

972 <sup>&</sup>Derived from CopraRNA predictions

973 <sup>#</sup>Experimental support rate is shown in parentheses

974 <sup>§</sup>Prior set was the union of the top 15 predictions (ranked by associated p-values), and the set of  
 975 targets with p-values  $\leq$  0.01 and annotated with enriched terms (iv)

976

977

978 **Table S3. Transcriptional prior networks and transcriptomic datasets used in this study**

| Species                       | Transcriptional prior network <sup>%</sup>                                    | Reference | Transcriptomic dataset <sup>#</sup>                | Reference |
|-------------------------------|-------------------------------------------------------------------------------|-----------|----------------------------------------------------|-----------|
| <i>Escherichia coli</i>       | RegulonDB version 9.0 (1875*)                                                 | (29)      | Many Microbe Microarrays <sup>†</sup> (4297 x 861) | (13)      |
| <i>Pseudomonas aeruginosa</i> | Collection of known transcriptional interactions                              | (70)      | COLOMBOS 3.0 <sup>Δ</sup> (5629 x 559)             | (51)      |
|                               | Experimental sigma factor network                                             | (71)      |                                                    |           |
|                               | RegPrecise <sup>&amp;</sup> (3569 <sup>Δ</sup> )                              | (30)      |                                                    |           |
| <i>Staphylococcus aureus</i>  | SigB regulon                                                                  | (26)      | HG001 (2837 x 156)                                 | (26)      |
|                               | RegPrecise <sup>&amp;</sup> (798 <sup>Δ</sup> )                               | (30)      |                                                    |           |
| <i>Bacillus subtilis</i>      | SubtiWiki                                                                     | (72)      | BSB1 (4445 x 269)                                  | (73)      |
|                               | Transcriptional network constructed with the Inferelator (2614 <sup>Σ</sup> ) | (27)      |                                                    |           |

<sup>%</sup>Number of interactions in the corresponding network is shown in parentheses

<sup>#</sup>Number of genes and number of arrays in the dataset are shown in parentheses

\*Only signed interaction with strong or confirmed evidence were included as priors

<sup>†</sup>Version with un-averaged replicates was used. 16 conditions related to sRNA KOs or their regulators were removed

<sup>&</sup>Only signed interactions (activation or repression) were considered

<sup>Δ</sup>Total number of interactions in the compiled network (including all mentioned sources)

<sup>Δ</sup>123 rows missing more than 10% of their values were removed

<sup>Σ</sup>Total number of interaction the compiled network. The network is composed of TF-gene interactions originally reported in SubtiWiki (72) that were recovered in the network reconstructed by the Inferelator, and experimentally supported novel interactions of the Inferelator-reconstructed model (27)

979

980
